# Supplementary material for: Total synthesis of (−)-conocarpan and assignment of the absolute configuration by chemical methods
Source: Royal Society of Chemistry journal article supplement (doi:10.1039/b704211f), 2007-01-01

## Total synthesis of (-)-conocarpan and assignment of the absolute configuration by chemical methods

Derrick L. J. Clive\* and Elia J. L. Stoffman

### SUPPORTING INFORMATION

In  $^1\text{H}$  NMR spectra the  $J$  values quoted are spacings measured directly from the spectrum.

All experiments were done under an inert atmosphere ( $\text{N}_2$  or Ar). Column sizes are quoted as diameter x height.

2-Propenoic acid, 3-phenyl-, ethyl ester, (2E)-

#### (2E)-3-[4-(Toluene-4-sulfonyloxy)phenyl]-2-propenoic Acid Ethyl Ester (6).

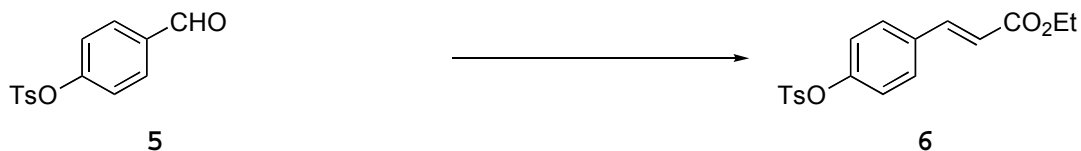

( $\text{EtO}$ ) $_2\text{P}$ ( $\text{O}$ ) $\text{CH}_2\text{CO}_2\text{Et}$  (11.6 mL, 58.47 mmol), followed by  $\text{Et}_3\text{N}$  (8.2 mL, 8.2 mmol), were added to a suspension of LiBr (5.27 g, 61.11 mmol) in THF (136 mL) and the mixture was stirred for 15 min. Aldehyde **5** (13.69 g, 49.55 mmol) was then added in one portion and stirring was continued for 4 h.  $\text{Et}_2\text{O}$  (250 mL) was added and the organic layer was washed with water, saturated aqueous  $\text{Na}_2\text{CO}_3$  and brine, dried ( $\text{MgSO}_4$ ) and evaporated. The residue was dissolved in EtOH (150 mL) and, after a few min, the product crystallized and was collected. A second crop was obtained when the filtrate was allowed to stand for several h. The total product, which was a white crystalline solid, weighed 13.88 g (81%): mp 75-78 °C; FTIR ( $\text{CH}_2\text{Cl}_2$  cast) 3068, 2982, 1710, 1415,

1200, 1177  $\text{cm}^{-1}$ ;  $^1\text{H}$  NMR ( $\text{CDCl}_3$ , 400 MHz)  $\delta$  1.35 (t,  $J$  = 7.1 Hz, 3 H), 2.47 (s, 3 H), 4.27 (q,  $J$  = 7.1 Hz, 2 H), 6.38 (d,  $J$  = 16.1 Hz, 1 H), 7.02 (apparent d as part of AA'BB' system,  $J$  = 8.7 Hz, 2 H), 7.33 (apparent d as part of AA'BB' system,  $J$  = 8.1 Hz, 2 H), 7.45 (apparent d as part of AA'BB' system,  $J$  = 8.8 Hz, 2 H), 7.62 (d,  $J$  = 16.1 Hz, 1 H), 7.73 (apparent d as part of AA'BB' system,  $J$  = 8.4 Hz, 2 H);  $^{13}\text{C}$  NMR ( $\text{CDCl}_3$ , 100 MHz)  $\delta$  14.3 (q), 21.7 (q), 60.6 (t), 119.3 (d), 122.9 (d), 128.5 (d), 129.2 (d), 129.8 (d), 132.3 (s), 133.4 (s), 142.8 (d), 145.6 (s), 150.7 (s), 166.6 (s); exact mass  $m/z$  calcd for  $\text{C}_{18}\text{H}_{18}\text{O}_5\text{S}$  346.08749, found 346.08836. Anal. Calcd for  $\text{C}_{18}\text{H}_{18}\text{SO}_5$ : C 62.40; H 5.24; S 9.26. Found: C 62.38; H 5.10; S 9.10.

**Toluene-4-sulfonic Acid 4-[(1E)-3-Hydroxy-1-propenyl]phenyl Ester (7).**

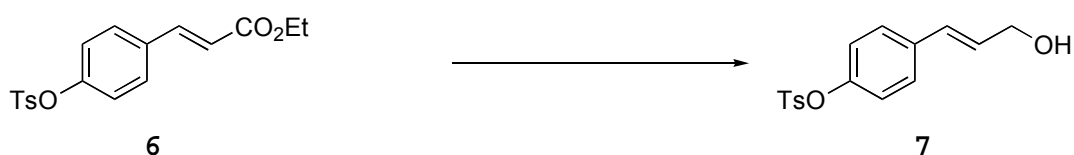

A three-necked flask was equipped with a stopper, a septum, a magnetic stirring bar and an addition funnel. The flask was charged with **6** (20.20 g, 58.32 mmol) and THF (200 mL) was added. The resulting solution was cooled to 0 °C in an ice bath, and the addition funnel was charged with DIBAL-H (1 M in hexane, 128 mL), which was then added dropwise over 1 h with stirring. After the addition, stirring at 0 °C was continued for 1 h, and the mixture was then quenched by addition of aqueous NaOH (1 M, 50 mL). The aqueous layer was extracted with  $\text{Et}_2\text{O}$  (3 x 50 mL) and the combined organic extracts were washed with aqueous NaOH (1 M, 2 x 50 mL) and brine (1x 50 mL). The ethereal solution was allowed to stand overnight, during which time an aluminum hydrate precipitated.  $\text{MgSO}_4$  and Celite were added and the mixture was filtered. Evaporation of the filtrate and flash chromatography of the residue over silica gel (5 x 30 cm), using 30-50% EtOAc-

hexane (gradient elution), gave **7** (16.84 g, 95%) as a crystalline solid: mp 64-67 °C; FTIR (CHCl<sub>3</sub> cast) 3363, 2868, 1597, 1501, 1371, 1197 cm<sup>-1</sup>; <sup>1</sup>H NMR (CDCl<sub>3</sub>, 400 MHz) δ 1.80 (br s, 1 H), 2.45 (s, 3 H), 4.31 (d, *J* = 5.1 Hz, 2 H), 6.30 (dt, *J* = 15.9, 5.5 Hz, 1 H), 6.56, (d, *J* = 16.0 Hz, 1 H), 6.92 (apparent d as part of AA'BB' system, *J* = 8.7 Hz, 2 H), 7.27 (apparent d as part of AA'BB' system, *J* = 8.6 Hz, 2 H), 7.31 (apparent dd as part of AA'BB' system, *J* = 8.6, 0.6 Hz, 2 H), 7.70 (apparent d as part of AA'BB' system, *J* = 8.4 Hz, 2 H); <sup>13</sup>C NMR (CDCl<sub>3</sub>, 100 MHz) δ 21.7 (q), 63.4 (t), 122.5 (d), 127.5 (d), 128.5 (d), 129.4 (d), 129.7 (d), 132.3 (s), 135.8 (s), 145.4 (s), 148.8 (s); exact mass *m/z* calcd for C<sub>16</sub>H<sub>16</sub>O<sub>4</sub>S 304.07693, found 304.07651.

**Toluene-4-sulfonic Acid 4-[(2*S*,3*R*)-3-Hydroxymethyloxiranyl]-phenyl Ester (8a).**

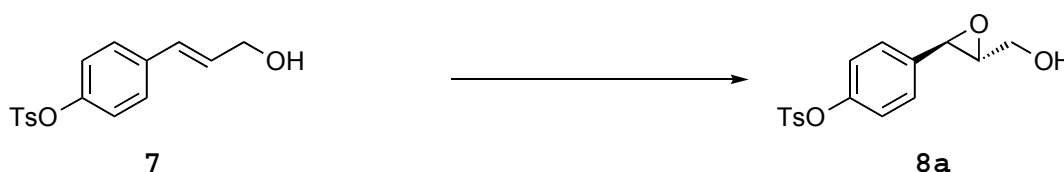

Crushed 4Å molecular sieves (500 mg), activated at >200 °C and 0.3 torr for 24 h, were added to a solution of (-)-diisopropyl tartrate (0.050 mL, 0.23 mmol) in CH<sub>2</sub>Cl<sub>2</sub> (4 mL), and the flask was lowered into a cold bath (-25 °C, CO<sub>2</sub>-CCl<sub>4</sub>). Ti(OPr-*i*)<sub>4</sub> (0.10 mL, 0.34 mmol) was then added, followed by *t*-BuOOH (3 M in isooctane, 1.6 mL, 4.8 mmol). The mixture was stirred for 10 min and then **7** (728.4 mg, 2.390 mmol) in CH<sub>2</sub>Cl<sub>2</sub> (1.2 mL plus 0.8 mL as a rinse) was added dropwise by syringe. The mixture was stirred for 2 h and then quenched by addition of aqueous NaOH (30%w/v, 0.38 mL) saturated with NaCl. Stirring was continued for 10 min and then MgSO<sub>4</sub> (ca 500 mg) and Celite (ca 1 g) were added. The mixture was swirled and the solids were filtered off. Evaporation of the filtrate and flash chromatography of the residue over silica gel (2.5 x 35 cm), using first 50-60% EtOAc-hexane (step gradient elution) and then

6:3:1 EtOAc-hexane-MeOH, gave **8a** (712.4 mg, 93%) as a white solid: mp 51-53 °C; FTIR (CHCl<sub>3</sub> cast) 3419, 3069, 2986, 2926, 2872, 1598, 1505, 1372, 1198, 1176, 1150 cm<sup>-1</sup>; <sup>1</sup>H NMR (CDCl<sub>3</sub>, 500 MHz) δ 1.74 (dd, *J* = 5.1, 7.7 Hz, 1 H), 2.49 (s, 3 H), 3.18 (ddd, *J* = 2.3, 2.3, 3.6 Hz, 1 H), 3.83 (ddd, *J* = 3.6, 7.8, 12.64 Hz, 1H), 3.93 (d, *J* = 2.0 Hz, 1 H), 4.06 (ddd, *J* = 2.5, 4.9, 12.9 Hz, 1 H), 6.99 (apparent d as part of AA'BB' system, *J* = 8.7 Hz, 2 H), 7.21 (apparent d as part of AA'BB' system, *J* = 8.5 Hz, 2 H), 7.30 (apparent d as part of AA'BB' system, *J* = 8.3 Hz, 2 H), 7.71 (apparent d as part of AA'BB' system, *J* = 8.3 Hz, 2 H); <sup>13</sup>C NMR (CDCl<sub>3</sub>, 100 MHz) δ 22.0 (t), 55.1 (d), 61.3 (t), 62.8 (d), 122.8 (d), 127.2 (d), 128.7 (d), 130.1 (d), 132.5 (s), 136.1 (s), 145.7 (s), 149.7 (s); exact mass *m/z* calcd for C<sub>16</sub>H<sub>16</sub>NaOS 343.06107, found 343.06134.

Samples of the Mosher esters (from the above optically active epoxy alcohol and the corresponding racemic epoxy alcohol) were prepared by adding (+)-MTPA-Cl to a stirred solution of the epoxy alcohol and Et<sub>3</sub>N in CH<sub>2</sub>Cl<sub>2</sub>. Analysis of the derived crude Mosher esters by <sup>1</sup>H NMR showed the diastereomeric ratio of the above epoxy alcohol to be 94:6. Analysis of the epoxy alcohol from another batch (but prepared under the same conditions) by chiral HPLC [Chiralpak AD-RH (150 x 4.6 mm), 1:1 MeCN-water, flow 0.5 mL/min, detection at 232 nm. Baseline separation of a racemic sample; retention times 11.9 min and 14.3 min.] showed the enantiomeric ratio to be 94.7:5.3.

**4-Nitrobenzoic Acid 3-[(2*R*,3*R*)-4-(Toluene-4-sulfonyloxy)-phenyl]oxiranylmethyl Ester (8b).**

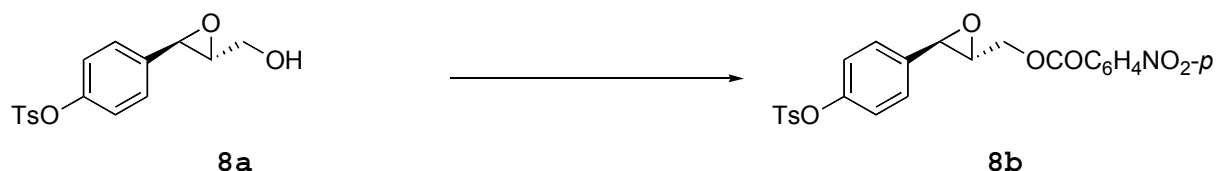

*p*-Nitrobenzoyl chloride (43.6 mg, 0.235 mmol) was added in one portion to a stirred solution of **8a** (64.3 mg, 0.201 mmol) and

Et<sub>3</sub>N (0.04 mL, 0.3 mmol) in CH<sub>2</sub>Cl<sub>2</sub> (3 mL). Stirring was continued for 2 h, and the mixture was then washed once with water, twice with saturated aqueous NaHCO<sub>3</sub>, and dried (MgSO<sub>4</sub>). Evaporation of the solvent and crystallization of the residue from MeOH gave **8b** (67.2 mg, 70%) as small white needles: mp 102-104 °C; [α]<sup>22</sup><sub>D</sub> +20.42 (c 0.62, CHCl<sub>3</sub>); FTIR (CH<sub>2</sub>Cl<sub>2</sub>, cast) 3112, 3057, 2997, 2955, 2868, 1926, 1728, 1598, 1528, 1373 cm<sup>-1</sup>; <sup>1</sup>H NMR (CDCl<sub>3</sub>, 400 MHz) δ 2.47 (s, 3 H), 3.37 (m, 1 H), 3.88 (d, *J* = 1.9 Hz, 1 H), 4.38 (dd, *J* = 12.4, 6.0 Hz, 1 H), 4.81 (dd, *J* = 12.3, 3.2 Hz, 1 H), 7.01 (apparent d as part of AA'BB' system, *J* = 8.7 Hz, 2 H), 7.24 (apparent d as part of AA'BB' system, *J* = 8.6 Hz, 2 H), 7.33 (apparent d as part of AA'BB' system, *J* = 8.1 Hz, 2 H), 7.72 (apparent d as part of AA'BB' system, *J* = 8.3 Hz, 2 H), 8.27 (apparent d as part of AA'BB' system, *J* = 8.9 Hz, 2 H), 8.33 (apparent d as part of AA'BB' system, *J* = 8.9 Hz, 2 H); <sup>13</sup>C NMR (CDCl<sub>3</sub>, 100 MHz) δ 21.7 (q), 55.8 (d), 59.2 (d), 65.3 (t), 122.7 (d), 123.6 (d), 126.9 (d), 128.5 (d), 129.8 (d), 130.9 (d), 132.3 (s), 134.8 (s), 134.9 (s), 145.5 (s), 149.7 (s), 150.8 (s), 164.4 (s); exact mass *m/z* calcd for C<sub>23</sub>H<sub>19</sub>NNaO<sub>8</sub>S 492.07236, found 492.07249. Anal. Calcd for C<sub>23</sub>H<sub>19</sub>NO<sub>8</sub>S: C 58.84; H 4.08; S 6.83. Found: C 58.82; H 4.14; S 7.07.

A separate sample from a later and larger-scale experiment was crystallized from 7:3 EtOAc-hexane and gave large prisms which had [α]<sup>22</sup><sub>D</sub> +20.22 (c 0.70, CHCl<sub>3</sub>). This nitrobenzoate was recrystallized again twice from EtOH, and the resulting material (total yield 62%) was used for the conocarpan synthesis.

**Toluene-4-sulfonic acid 4-[(2*R*,3*R*)-(3-Hydroxymethyl-oxiranyl)]phenyl Ester (8a').**

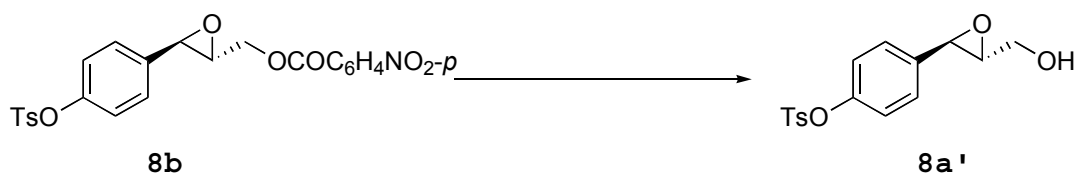

K<sub>2</sub>CO<sub>3</sub> (1.90 g, 13.7 mmol) was added to a stirred solution of

**8b** (5.46 g, 11.6 mmol) in 80% MeOH (100 mL). The mixture was stirred until a clear solution was obtained (ca 2.5 h). The MeOH was then evaporated, the residue was dissolved in EtOAc and the solution was washed three times with saturated aqueous NaHCO<sub>3</sub> and once with brine, and dried (MgSO<sub>4</sub>). Evaporation of the solvent and flash chromatography of the residue over silica gel (2.5 x 40 cm), using first 50% EtOAc-hexane containing Et<sub>3</sub>N (ca 3 drops/100 mL) and then 60% EtOAc-hexane containing Et<sub>3</sub>N (ca 3 drops/100 mL), gave **8a'** (3.6178 g, 97%).

The hydrolysis was repeated on a small scale, using the same batch of **8b**, and HPLC analysis of the product [Chiralpak AD-RH (150 x 4.6 mm), 1:1 MeCN-water, flow 0.5 mL/min, detection at 232 nm. Baseline separation of a racemic sample] showed the enantiomeric ratio to be 98.9:1.1. The material had:  $[\alpha]^{25}_D$  18.35 (*c* 0.75, CHCl<sub>3</sub>); all other data are identical to those reported above.

**Toluene-4-sulfonic Acid 4-[(1*S*,2*R*)-1-(4-formyl-2,3-dihydroxy-2-iodophenoxy)propyl]phenyl Ester (10).**<sup>21</sup>

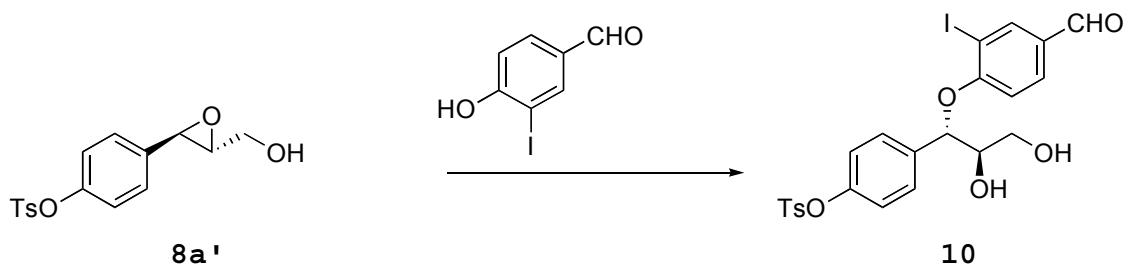

Epoxy alcohol **8a'** (er = 99.8:1.1) (1.8694 g, 5.8350 mmol) was added in one portion to a stirred and heated (sand bath, 70 °C) solution of 4-hydroxy-3-iodobenzaldehyde<sup>19</sup> (2.6359 g, 10.628 mmol) in a mixture of aqueous NaOH (1 M, 5.8 mL, 5.8 mmol) and water (6 mL). Stirring at 70 °C was continued for 2.5 h. The mixture was allowed to cool and was then poured into aqueous NaOH (1 M, 10 mL). The aqueous phase was extracted with Et<sub>2</sub>O and the combined organic extracts were washed with brine and dried (MgSO<sub>4</sub>). Evaporation of the solvent and flash chromatography of

the residue over silica gel (2.5 x 35 cm), using 50-80% EtOAc-hexane containing Et<sub>3</sub>N (ca 3 drops/100 mL) (gradient elution), gave **10** [2.1124 g, 64%, or 83% based on recovered **8a'** (436.8 mg, 23%)] as a white, crystalline solid: mp 55-58 °C; [ $\alpha$ ]<sup>22</sup><sub>D</sub> -39.52 (*c* 5.69, CHCl<sub>3</sub>); FTIR (CDCl<sub>3</sub> cast) 3417, 3067, 2927, 2883, 2731, 1694, 1587, 1502, 1480, 1371, 1255, 1198, 1177, 1155, 1093, 1038, 869 cm<sup>-1</sup>; <sup>1</sup>H NMR (CDCl<sub>3</sub>, 400 MHz)  $\delta$  2.33 (br s, 1 H), 2.45 (s, 3 H), 2.75 (br s, 1 H), 3.82 (dd, *J* = 3.7, 11.5 Hz, 1 H), 3.94 (dd, *J* = 5.2, 11.5 Hz, 1 H), 4.03-4.06 (m, 1 H), 5.40 (d, *J* = 5.8 Hz, 1 H), 6.64 (d, *J* = 8.6 Hz, 1 H), 7.03 (apparent d as part of AA'BB' system, *J* = 8.7 Hz, 2 H), 7.30 (apparent dd as part of AA'BB' system, *J* = 0.6, 8.6 Hz, 2 H), 7.33 (apparent d as part of AA'BB' system, *J* = 8.6 Hz, 2 H), 7.60 (dd, *J* = 2.0, 8.6 Hz, 1 H), 7.69 (apparent d as part of AA'BB' system, *J* = 8.4 Hz, 2 H), 8.27 (d, *J* = 2.0 Hz, 1 H), 9.76 (s, 1 H); <sup>13</sup>C NMR (CDCl<sub>3</sub>, 100 MHz)  $\delta$  21.7 (q), 62.3 (t), 74.4 (d) 81.4 (d), 87.4 (s), 113.3 (d), 122.9 (d), 128.2 (d), 128.3 (d), 129.8 (d), 131.7 (d), 131.8 (s), 132.3 (s), 135.2 (s), 140.9 (d), 145.6 (s), 149.6 (s), 160.1 (s), 189.2 (d); exact mass *m/z* calcd for C<sub>23</sub>H<sub>21</sub>INaO<sub>7</sub>S 590.99450, found 590.99454.

**Toluene-4-sulfonic Acid 4-[(1*S*,2*R*)-1-(4-formyl-2-iodophenoxy)-2,3-bismethanesulfonyloxypropyl]phenyl Ester (11).**

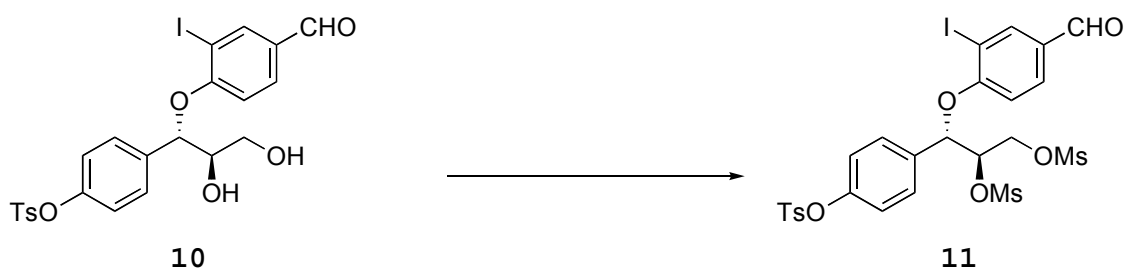

Et<sub>3</sub>N (0.022 mL, 0.16 mmol) and then MeSO<sub>2</sub>Cl (0.012 mL, 0.16 mmol) were added to a stirred and cooled (0 °C) solution of **10** (37.4 mg, 0.0659 mmol) in CH<sub>2</sub>Cl<sub>2</sub> (2 mL). After the addition stirring was continued for 10 min, the cooling bath was removed and stirring was continued overnight. The mixture was washed

twice with water and dried ( $\text{MgSO}_4$ ). Evaporation of the solvent gave an oil which was kept under oil pump vacuum for 12 h to give **11** (48.8 mg, 100%) as a white, crystalline solid: mp 60-64 °C;  $[\alpha]_D^{22}$  -31.92 (*c* 4.10,  $\text{CHCl}_3$ ); FTIR ( $\text{CDCl}_3$  cast) 3031, 2939, 2849, 1694, 1588, 1503, 1480, 1412, 1365, 1251, 1199, 1178, 1156, 1041, 1017, 866  $\text{cm}^{-1}$ ;  $^1\text{H}$  NMR ( $\text{CDCl}_3$ , 300 MHz)  $\delta$  2.50 (s, 3 H), 2.89 (s, 3 H), 3.11 (s, 3 H), 4.68 (dd,  $J = 2.5, 11.9$  Hz, 1 H), 4.92 (dd,  $J = 5.9, 11.9$  Hz, 1 H), 5.12 (ddd,  $J = 2.5, 5.8, 5.8$  Hz, 1 H), 5.69 (d,  $J = 5.8$  Hz, 1 H), 6.70 (d,  $J = 8.6$  Hz, 1 H), 7.13 (apparent d as part of AA'BB' system,  $J = 8.7$  Hz, 2 H), 7.36 (apparent dd as part of AA'BB' system,  $J = 0.6, 8.6$  Hz, 2 H), 7.44 (apparent d as part of AA'BB' system,  $J = 8.6$  Hz, 2 H), 7.73 (apparent d as part of AA'BB' system,  $J = 8.4$  Hz, 2 H), 7.73 (dd,  $J = 2.0, 8.5$  Hz, 1 H), 8.35 (d,  $J = 2.0$  Hz, 1 H), 9.84 (s, 1 H);  $^{13}\text{C}$  NMR ( $\text{CDCl}_3$ , 100 MHz)  $\delta$  22.0 (q), 38.0 (q), 38.7 (q), 67.0 (t), 78.9 (d), 80.4 (d), 87.4 (s), 113.4 (d), 123.8 (d), 128.4 (d), 128.7 (d), 130.2 (d), 132.0 (d), 132.3 (s), 132.6 (s), 133.3 (s), 141.3 (d), 146.0 (s), 150.6 (s), 159.5 (s), 189.3 (d); exact mass *m/z* calcd for  $\text{C}_{25}\text{H}_{25}\text{INaO}_{11}\text{S}_3$  746.94960, found 746.94935.

**Toluene-4-sulfonic Acid 4-[(*R*)-1-(4-formyl-2-iodophenoxy)-allyl]phenyl Ester (12).**

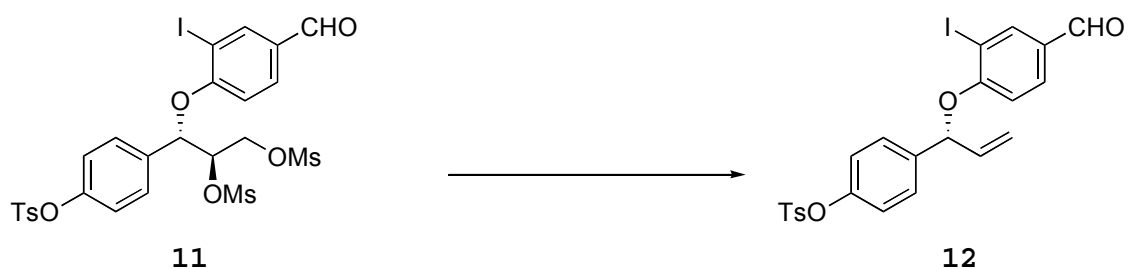

NaI (91.7 mg, 0.612 mmol) was added to a stirred solution of **11** (29.5 mg, 0.0408 mmol) in 2-butanone (2 mL), and the mixture was refluxed for 4 h, and then allowed to cool. The solvent was evaporated and the residue was partitioned between EtOAc and saturated aqueous  $\text{Na}_2\text{S}_2\text{O}_3$ . The combined organic extracts were washed with brine, dried ( $\text{MgSO}_4$ ) and evaporated. Flash



chromatography of the residue over silica gel (0.5 x 20 cm), using 30% EtOAc-hexane, gave **12** (15.7 mg, 71%) as an amber oil:  $[\alpha]^{22}_D$  -8.88 (*c* 13.43, CH<sub>2</sub>Cl<sub>2</sub>); FTIR (CH<sub>2</sub>Cl<sub>2</sub> cast) 3065, 2922, 2834, 2727, 1695, 1587, 1501, 1479, 1371, 1252, 1197, 1177, 1154, 1093, 866 cm<sup>-1</sup>; <sup>1</sup>H NMR (CDCl<sub>3</sub>, 500 MHz)  $\delta$  2.48 (s, 3 H), 5.36 (dd, *J* = 0.8, 10.4 Hz, 1 H), 5.50 (dd, *J* = 0.8, 17.1 Hz, 1 H), 5.83 (d, *J* = 5.9 Hz, 1 H), 6.05 (ddd, *J* = 5.9, 10.4, 17.0 Hz, 1 H), 6.88 (d, *J* = 8.5 Hz, 1 H), 7.06 (apparent d as part of AA'BB' system, *J* = 8.6 Hz, 2 H), 7.33 (apparent d as part of AA'BB' system, *J* = 8.5 Hz, 2 H), 7.45 (apparent d as part of AA'BB' system, *J* = 8.8 Hz, 2 H), 7.73 (apparent d as part of AA'BB' system, *J* = 8.3 Hz, 2 H), 7.76 (dd, *J* = 2.0, 8.5 Hz, 1 H), 8.34 (d, *J* = 1.9 Hz, 1 H), 9.83 (s, 1 H); <sup>13</sup>C NMR (CDCl<sub>3</sub>, 125 MHz)  $\delta$  21.7 (q), 81.4 (d), 87.8 (s), 113.6 (d), 117.8 (t), 122.8 (d), 127.8 (d), 128.4 (d), 129.8 (d), 131.5 (d), 131.6 (s), 132.4 (s), 136.2 (d), 137.6 (s), 141.2 (d), 145.5 (s), 149.3 (s), 160.6 (s), 189.2 (d); exact mass *m/z* calcd for C<sub>23</sub>H<sub>19</sub>IO<sub>5</sub>S 556.98902, found 556.98890. Anal. Calcd for C<sub>23</sub>H<sub>19</sub>IO<sub>5</sub>S: C 51.69; H 3.58; S 6.00. Found: C 51.41; H 3.65; S 5.92.

When the experiment was repeated on a larger scale with the dimesylate (2.1255 g, 2.94 mmol), the yield was 65% [or 80% based on recovered **11** (398.1 mg, 19%)].

**Toluene-4-sulfonic Acid 4-[(2*S*,3*R*)-2,3-Dihydro-5-formyl-3-methylbenzofuran-2-yl]phenyl Ester (**13**).**

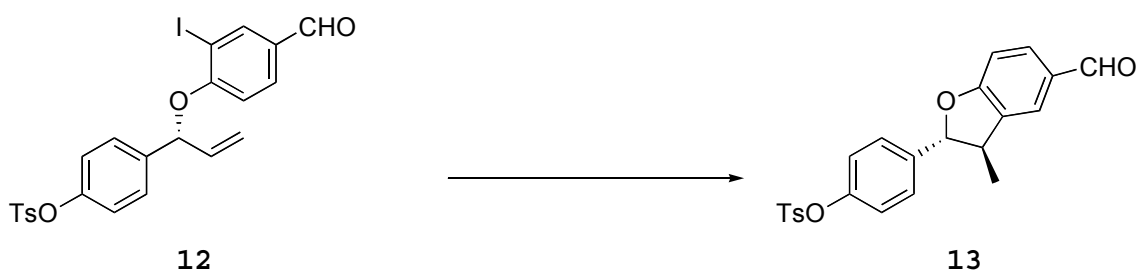

A solution of Bu<sub>3</sub>SnH (0.62 mL, 2.3 mmol) and AIBN (48.1 mg, 0.293 mmol) in PhMe (18 mL) was added over 4 h (syringe pump) to a stirred and heated (80 °C) solution of **12** (910.4 mg, 1.704

mmol) in PhMe (18 mL) ( $N_2$  atmosphere). After the addition the mixture was heated for a further 2 h and then allowed to cool. Evaporation of the solvent and flash chromatography of the residue over KF-silica gel<sup>31</sup> (10%w/w, 2.5 x 30 cm), using 25% EtOAc-hexane, gave **13** (482.6 mg, 69%) as a light yellowish oil:  $[\alpha]^{22}_D$  -50.54 ( $c$  0.77,  $CHCl_3$ ); FTIR ( $CHCl_3$  cast) 2964, 2928, 1690, 1605, 1504, 1483, 1373, 1247, 1198, 1177, 1154, 1093, 867  $cm^{-1}$ ;  $^1H$  NMR ( $CDCl_3$ , 400 MHz)  $\delta$  1.40 (d,  $J$  = 6.9 Hz, 3 H), 2.38 (s, 3 H), 3.31-3.38 (m, 1 H), 5.19 (d,  $J$  = 8.4 Hz, 1 H), 6.88 (d,  $J$  = 8.1 Hz, 1 H), 6.96 (apparent d as part of AA'BB' system,  $J$  = 8.7 Hz, 2 H), 7.24-7.27 (m, 4 H), 7.64-7.67 (m, 4 H), 9.80 (s, 1 H);  $^{13}C$  NMR ( $CDCl_3$ , 100 MHz) (the spectrum shows minor aromatic impurities)  $\delta$  18.3 (q), 21.7 (q), 44.8 (d), 92.7 (d), 109.8 (d), 122.8 (d), 124.7 (d), 127.1 (d), 128.5 (d), 129.8 (d), 131.0 (s), 132.4 (s), 133.1 (s), 133.4 (d), 138.9 (s), 145.5 (s), 149.6 (s), 164.3 (s), 190.5 (d); exact mass  $m/z$  calcd for  $C_{23}H_{20}NaO_5S$  431.09237, found 431.09242.

**Toluene-4-sulfonic Acid 4-[(2*R*,3*S*)-2,3-Dihydro-(3-methyl-5-(1*E*)-1-propenylbenzofuran-2-yl)phenyl Ester (*E*-14) and Toluene-4-sulfonic Acid 4-[(2*R*,3*S*)-2,3-Dihydro-3-methyl-5-(1*Z*)-1-propenylbenzofuran-2-yl]phenyl Ester (*Z*-14).**

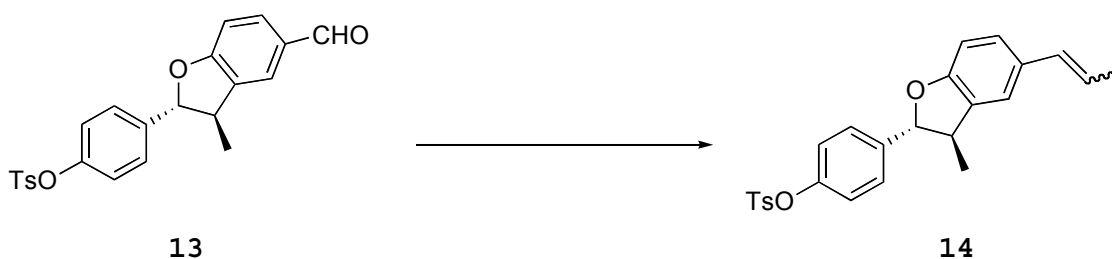

(a) Use of *t*-BuOK

*t*-BuOK (33.0 mg, 0.294 mmol) was added to a stirred suspension of  $Ph_3PEt^+I^-$  (129.6 mg, 0.3098 mmol) in  $Et_2O$  (2 mL), and the mixture was stirred for 0.5 h. A solution of **13** (54.2 mg, 0.133 mmol) in  $Et_2O$  (1 mL) was added by syringe. The mixture was stirred for 15 min and then  $Et_2O$  (5 mL) was added, and the

mixture was washed twice with water, and once with brine and dried ( $\text{MgSO}_4$ ). Evaporation of the solvent and flash chromatograph of the residue over silica gel (1.5 x 30 cm), using 5-10% EtOAc-hexane (gradient elution), gave **14** (33.9 mg, 62%) as a yellowish oil. Integration of the allylic methyl peaks in the  $^1\text{H}$  NMR spectrum showed the *E:Z* ratio to be 1:3; apart from this ratio difference, all spectral data corresponded to those reported below for the 97:3 mixture of the same compounds.

(b) Use of BuLi

BuLi (1.6 M in hexanes, 0.06 mL, 0.096 mmol) was added to a stirred and cooled (0 °C) suspension of  $\text{Ph}_3\text{PEt}^+\text{I}^-$  (39.5 mg, 0.0944 mmol) in THF (2 mL). Stirring was continued for 15 min and **13** (35.7 mg, 0.0796 mmol) in THF (1.3 mL plus 0.3 mL as a rinse) was added dropwise by syringe. Stirring was continued for 2 h and the mixture was then quenched by addition of saturated aqueous  $\text{NaHCO}_3$  (0.5 mL), and partitioned between water (5 mL) and  $\text{Et}_2\text{O}$  (10 mL). The organic extract was dried ( $\text{MgSO}_4$ ) and evaporated. Flash chromatography of the residue over silica gel (0.5 x 30 cm), using 20% EtOAc-hexane containing ca 1%  $\text{Et}_3\text{N}$ , gave **14** (23.2 mg, 69%) as a yellowish oil, which was a mixture of *Z* and *E* isomers.

**Toluene-4-sulfonic Acid 4-[(2*R*,3*S*)-2,3-Dihydro-3-methyl-5-(1*E*)-1-propenylbenzofuran-2-yl]phenyl Ester (15)**

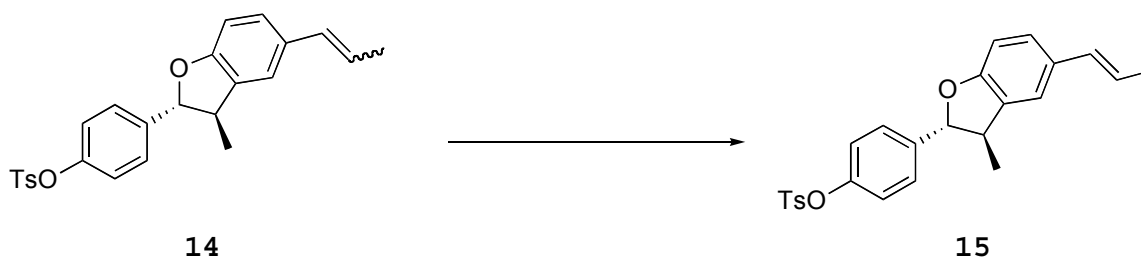

(a) Short reaction time

$\text{PdCl}_2(\text{PhCN})_2$  (9.4 mg, 0.025 mmol) was added to a stirred solution of **14** (102.3 mg, 0.2433 mmol) in  $\text{CH}_2\text{Cl}_2$  (2 mL, and

stirring was continued for 23 h. Et<sub>2</sub>O (3 mL) was added and the solution was filtered through a pad of Florisil (3 x 2 cm) using Et<sub>2</sub>O (25 mL). Evaporation of the solvent and flash chromatography of the residue over silica gel (1 x 30 cm) using 8% EtOAc-hexane containing Et<sub>3</sub>N (ca 3 drops/100 mL), gave **15** (100.9 mg, 99%) as a colorless oil which contained 3.1% of the *Z* isomer (<sup>1</sup>H NMR): [α]<sup>22</sup><sub>D</sub> -59.93 (c 2.24, CH<sub>2</sub>Cl<sub>2</sub>); FTIR (CH<sub>2</sub>Cl<sub>2</sub> cast) 3021, 2962, 2928, 1598, 1503, 1486, 1375, 1243, 1199, 1177, 1154, 1094, 968, 868 cm<sup>-1</sup>; <sup>1</sup>H NMR (CDCl<sub>3</sub>, 400 MHz) δ 1.42 (d, *J* = 6.9 Hz, 3 H), 1.86 (dd, *J* = 1.7, 6.6 Hz, 3 H), 2.45 (s, 3 H), 3.34 (m, 1 H), 5.12 (d, *J* = 8.4 Hz, 1 H), 6.09 (dq, *J* = 6.7, 15.7 Hz, 1 H), 6.36 (dd, *J* = 1.7, 15.7 Hz, 1 H), 6.77 (d, *J* = 8.8 Hz, 1 H), 6.99 (apparent d as part of AA'BB' system, *J* = 8.7 Hz, 2 H), 7.12 (s, 1 H), 7.12-7.13 (m, 1 H), 7.32 (apparent dd as part of AA'BB' system, *J* = 0.7, 7.9 Hz, 2 H), 7.33 (apparent d as part of AA'BB' system, *J* = 8.4 Hz, 2 H), 7.72 (apparent d as part of AA'BB' system, *J* = 8.4 Hz, 2 H); <sup>13</sup>C NMR (CDCl<sub>3</sub>, 100 MHz) δ 18.3 (q), 18.4 (q), 21.7 (q), 45.6 (d), 91.7 (d), 109.3 (d), 120.8 (d), 122.6 (d), 123.3 (d), 126.4 (d), 127.2 (d), 128.5 (d), 129.8 (d), 130.6 (d), 131.6 (s), 131.8 (s), 132.4 (s), 140.0 (s), 145.4 (s), 149.3 (s), 158.1 (s); exact mass *m/z* calcd for C<sub>25</sub>H<sub>24</sub>NaO<sub>4</sub>S 443.12875, found 443.12864.

(b) Long reaction time

PdCl<sub>2</sub>(PhCN)<sub>2</sub> (5.3 mg, 0.0138 mmol) was added to a stirred solution of **14** (36.0 mg, 0.0856 mmol) in CH<sub>2</sub>Cl<sub>2</sub> (2 mL, and stirring was continued for 10 days. The solution was filtered through a pad of Florisil (1 x 1 cm), using CH<sub>2</sub>Cl<sub>2</sub> as a rinse. Evaporation of the solvent and flash chromatography of the residue over silica gel (0.5 x 30 cm), using 13% EtOAc-hexane containing Et<sub>3</sub>N (ca 3 drops/100 mL), gave **15** (30.5 mg, 85%) as a colorless oil with spectral data identical to those reported above, except that the *Z* isomer could not be detected in the <sup>1</sup>H NMR spectrum (400 MHz).

**4 - [(2*R*, 3*R*) - 2, 3-Dihydro-3-methyl-5- (1*E*) - 1-propenylbenzo-**

furan-2-yl]phenol [(+)-Conocarpan] (**1**).

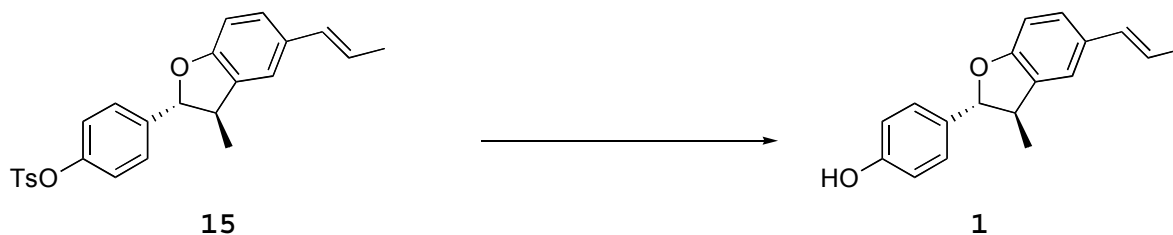

Na(Hg) (Aldrich, 10% Na, 868.9 mg, 3.779 mmol Na) were added in one portion to a stirred solution of **15** (197.0 mg, 0.4685 mmol) in 80% MeOH (8 mL), and stirring was continued overnight. The solution was then decanted from the Hg, and diluted with water (10 mL). The mixture was extracted with Et<sub>2</sub>O (3 x 10 mL), by which stage the aqueous layer was free of product (TLC control, silica, 30% EtOAc-hexane). The combined organic extracts were washed with brine and dried (MgSO<sub>4</sub>). Evaporation of the solvent and flash chromatography of the residue over silica gel (1.5 x 25 cm), using 0-15% EtOAc-hexane, gave **1** (119.0 mg, 95%) as a white, crystalline solid: mp 120-123 °C [lit.<sup>4a</sup> 133-135 °C; lit.<sup>4g</sup> 124-126 °C]; [α]<sup>22</sup><sub>D</sub> -82.24 (c 1.04, MeOH), Lit.<sup>4a</sup>[α]<sup>21</sup><sub>D</sub> +122 (c 1.03, MeOH); FTIR (microscope, CH<sub>2</sub>Cl<sub>2</sub>) 3395, 3022, 2962, 2928, 2882, 1614, 1517, 1487, 1240, 1202, 1171, 964, 831; <sup>1</sup>H NMR (CDCl<sub>3</sub>, 500 MHz) δ 1.40 (d, *J* = 6.8 Hz, 3 H), 1.86 (dd, *J* = 1.6, 6.6 Hz, 3 H), 3.37-3.43 (m, 1 H), 5.00 (s, 1 H), 5.08 (d, *J* = 8.9 Hz, 1 H), 6.09 (dq, *J* = 6.6, 15.6 Hz, 1 H), 6.37 (d, *J* = 15.6 Hz, 1 H), 6.76 (d, *J* = 8.1 Hz, 1 H), 6.83 (apparent d as part of AA'BB' system, *J* = 8.5 Hz, 2 H), 7.12-7.14 (m, 2 H), 7.30 (apparent d as part of AA'BB' system, *J* = 8.5 Hz, 2 H); <sup>13</sup>C NMR (CDCl<sub>3</sub>, 125 MHz) δ 17.9 (q), 18.4 (q), 45.3 (d), 92.7 (d), 109.3 (d), 115.5 (d), 120.8 (d), 123.1 (d), 126.3 (d), 127.9 (d), 130.8 (d), 131.3 (s), 132.4 (s), 132.9 (s), 155.7 (s), 158.3 (s); exact mass *m/z* calcd for C<sub>19</sub>H<sub>22</sub>O<sub>2</sub> 282.16199, found 282.16095. HPLC analysis [Chiralcel OD column (0.46 x 15.0 cm); 90:10 heptane-isopropanol; flow rate 0.6 mL/min; 40 °C; detection at 210 nm] of our synthetic conocarpan showed that it had ee of 88%

(i.e. enantiomeric ratio = 94:6)

**Toluene-4-sulfonic Acid 4-[(2*R*,3*R*)-3-(methanesulfonyloxy-methyl)oxiranyl]phenyl Ester (16).**

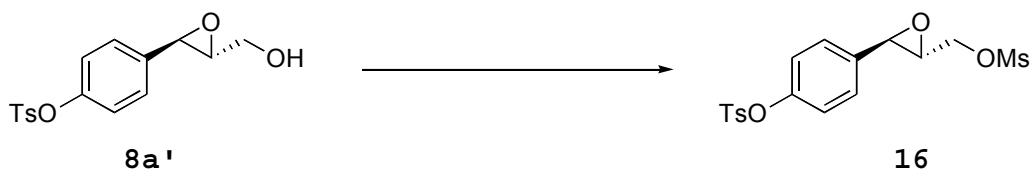

MeSO<sub>2</sub>Cl (0.14 mL, 1.8 mmol) was added dropwise by syringe to a stirred and cooled (0 °C) solution of **8a'** (514.6 mg, 1.606 mmol) and Et<sub>3</sub>N (0.30 mL, 2.2 mmol) in CH<sub>2</sub>Cl<sub>2</sub> (Ar atmosphere). The mixture was stirred for 1 h, diluted with CH<sub>2</sub>Cl<sub>2</sub> (10 mL), washed once with water (6 mL) and dried (MgSO<sub>4</sub>). Evaporation of the solvent gave **16** as a colorless oil that was used without further purification: [α]<sup>22</sup><sub>D</sub> +16.33 (*c* 1.56, CHCl<sub>3</sub>); FTIR (CHCl<sub>3</sub> cast) 3032, 1598, 1506, 1359, 1199, 1177, 1155, 1093, 868 cm<sup>-1</sup>; <sup>1</sup>H NMR (CDCl<sub>3</sub>, 400 MHz) δ 2.48 (s, 3 H), 3.12 (s, 3 H), 3.30 (ddd, *J* = 2.0, 3.2, 5.5 Hz, 1 H), 3.87 (d, *J* = 2.0 Hz, 1 H), 4.31 (dd, *J* = 5.6, 12.1 Hz, 1 H), 4.58 (dd, *J* = 3.2, 12.1 Hz, 1 H), 7.01 (apparent d as part of AA'BB' system, *J* = 8.6 Hz, 2 H), 7.22 (apparent d as part of AA'BB' system, *J* = 8.6 Hz, 2 H), 7.34 (apparent d as part of AA'BB' system, *J* = 8.3 Hz, 2 H), 7.72 (apparent d as part of AA'BB' system, *J* = 8.3 Hz, 2 H); <sup>13</sup>C NMR (CDCl<sub>3</sub>, 100 MHz) δ 22.0 (q), 38.2 (q), 56.0 (d), 59.1 (d), 68.8 (t), 123.0 (d), 127.2 (d), 128.8 (d), 130.1 (d), 132.5 (s), 134.7 (s), 145.8 (s), 150.1 (s); exact mass *m/z* calcd for C<sub>17</sub>H<sub>18</sub>NaO<sub>7</sub>S<sub>2</sub> 421.03862, found 421.03835.

**Toluene-4-sulfonic Acid 4-[(*S*)-1-Hydroxyallyl]phenyl Ester (17).**

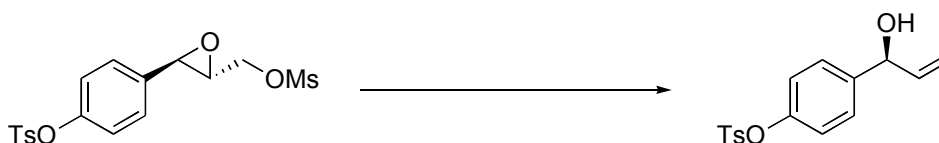

16

17

NaI (2.42 g, 16.1 mmol) was added to a stirred solution of **16** (total product from previous experiment, ca 1.6 mmol) in glyme (8 mL). The vessel was flushed with Ar and the mixture was refluxed for 12 h, and then allowed to cool. The mixture was diluted with EtOAc (10 mL), washed with saturated aqueous Na<sub>2</sub>S<sub>2</sub>O<sub>3</sub> (8 mL), water (8 mL) and brine (5 mL), dried (MgSO<sub>4</sub>) and evaporated. Flash chromatography of the residue over silica gel (1.5 x 30 cm), using 27% EtOAc-hexanes containing a trace (0.4-1% v/v) of Et<sub>3</sub>N, gave **17** (279.8 mg, 57% over 2 steps from the hydroxy epoxide) as a colorless oil:  $[\alpha]^{22}_D +4.63$  (*c* 0.57, CHCl<sub>3</sub>); FTIR (CHCl<sub>3</sub> cast) 3533, 3400, 3068, 2981, 2924, 2872, 1597, 1500, 1402, 1371, 1197, 1175, 1154, 1093, 867 cm<sup>-1</sup>; <sup>1</sup>H NMR (C<sub>6</sub>D<sub>6</sub>, 300 MHz)  $\delta$  1.10 (d, *J* = 3.7 Hz, 1 H), 1.74 (s, 3 H), 4.62-4.65 (m, 1 H), 4.86 (dt, *J* = 1.5, 10.3 Hz, 1 H), 5.03 (dt, *J* = 1.5, 17.1 Hz, 1 H), 5.64 (ddd, *J* = 5.9, 10.3, 17.1 Hz, 1 H), 6.57 (apparent d as part of AA'BB' system, *J* = 8.3 Hz, 2 H), 6.92-9.98 (m, 4 H), 7.63 (apparent d as part of AA'BB' system, *J* = 8.3 Hz, 2 H); <sup>13</sup>C NMR (C<sub>6</sub>D<sub>6</sub>, 100 MHz) (two signals coincident)  $\delta$  21.2 (q), 74.4 (d), 114.7 (t), 122.6 (d), 128.7 (d), 129.8 (d), 133.4 (s), 140.5 (d), 142.3 (s), 144.9 (s), 149.5 (s); exact mass *m/z* calcd for C<sub>16</sub>H<sub>16</sub>NaO<sub>4</sub>S 327.06615, found 327.06657.

Attempts to prepare the Mosher ester by a literature method<sup>32</sup> gave material that had clearly undergone extensive epimerization during the derivatization, as the ratio of diastereoisomers was 2.3:0.95 (<sup>1</sup>H NMR), while the parent epoxide had an er of 98.9:1.1. We were unable to separate the corresponding racemic alcohol by chiral HPLC.

**Toluene-4-sulfonic Acid 4-[(*S*)-1-(*tert*-Butyldimethyl-silyloxy)allyl]phenyl Ester (18).**

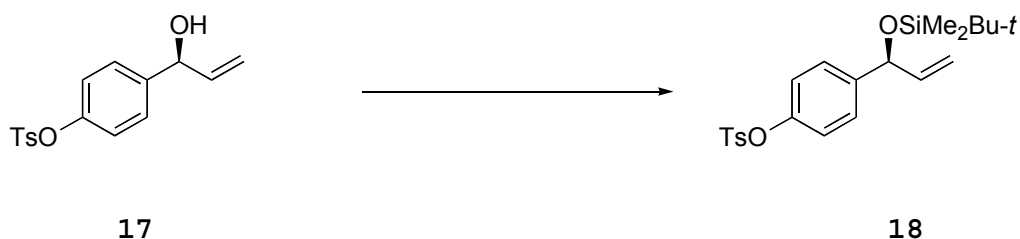

*t*-BuMe<sub>2</sub>SiOSO<sub>2</sub>CF<sub>3</sub> (0.25 mL, 1.1 mmol) was added dropwise by syringe to a stirred and cooled (-78 °C) solution of **17** (269.8 mg, 0.8865 mmol) and *sym*-collidine (0.26 mL, 2.0 mmol) in CH<sub>2</sub>Cl<sub>2</sub> (3 mL) (Ar atmosphere). Stirring at -78 °C was continued for 15 min and then saturated aqueous NaHCO<sub>3</sub> (0.5 mL) was added and the cooling bath was removed. After ca 15 min, CH<sub>2</sub>Cl<sub>2</sub> (10 mL) was added and the mixture was washed with water (8 mL), dried (MgSO<sub>4</sub>) and evaporated. Flash chromatography of the residue over silica gel (1.5 x 25 cm), using 13% EtOAc-hexanes containing a trace (0.5-1%v/v) of Et<sub>3</sub>N, gave **18** (370.6 mg, 100%) as a colorless oil: [α]<sup>22</sup><sub>D</sub> -6.46 (*c* 1.21, CHCl<sub>3</sub>); FTIR (CHCl<sub>3</sub> cast) 2954, 2928, 2885, 2856, 1598, 1499, 1472, 1376, 1294, 1197, 1175, 1154, 1093, 865 cm<sup>-1</sup>; <sup>1</sup>H NMR (C<sub>6</sub>D<sub>6</sub>, 400 MHz) δ 0.00 (s, 3 H), 0.11 (s, 3 H), 1.02 (s, 9 H), 1.84 (s, 3 H), 4.98 (dt, *J* = 1.5, 10.3 Hz, 1 H), 5.02 (d, *J* = 6.0 Hz, 1 H), 5.23 (dt, *J* = 1.5, 17.0 Hz, 1 H), 5.80 (ddd, *J* = 5.9, 10.2, 17.0 Hz, 1 H), 6.67 (apparent dd as part of AA'BB' system, *J* = 0.7, 8.6 Hz, 2 H), 7.06 (apparent d as part of AA'BB' system, *J* = 8.8 Hz, 2 H), 7.17 (apparent dd as part of AA'BB' system, *J* = 0.6, 8.9 Hz, 2 H), 7.71 (apparent d as part of AA'BB' system, *J* = 8.4 Hz, 2 H); <sup>13</sup>C NMR (C<sub>6</sub>D<sub>6</sub>, 100 MHz) δ -4.8 (q), 18.4 (s), 21.1 (q), 26.0 (q), 75.6 (d), 113.8 (t), 122.6 (d), 127.4 (d), 128.8 (d), 129.6 (d), 133.6 (s), 141.4 (d), 142.7 (s), 144.7 (s), 149.5 (s); exact mass *m/z* calcd for C<sub>22</sub>H<sub>30</sub>NaO<sub>4</sub>SSi 441.15263, found 441.15262.

**Toluene-4-sulfonic Acid 4-[(*S*)-1-(*tert*-Butyldimethylsilyloxy)propyl]phenyl Ester (19).**



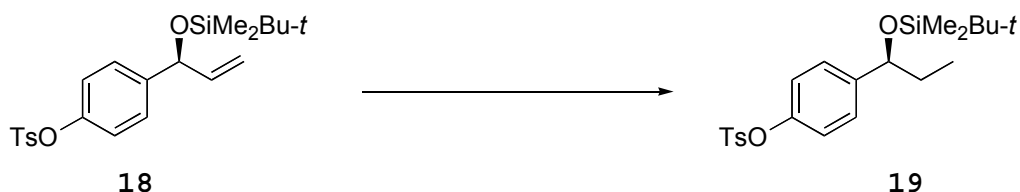

Rh-Al<sub>2</sub>O<sub>3</sub> (5% w/w, 9.7 mg, 0.0047 mmol) was added to a solution of **18** (30.3 mg, 0.0724 mmol) in THF (1.8 mL). The mixture was stirred and degassed by sequentially evacuating the flask (house vacuum) and then admitting H<sub>2</sub>, this sequence being repeated twice more. The mixture was stirred overnight under H<sub>2</sub> (balloon) and then filtered through a short pad (0.5 x 1 cm) of silica gel, using CH<sub>2</sub>Cl<sub>2</sub> as a rinse. Evaporation of the filtrate gave **19** (30.3 mg, 99%) as a colorless oil:  $[\alpha]^{22}_D$  -26.43 (*c* 3.03, CHCl<sub>3</sub>); FTIR (CHCl<sub>3</sub> cast) 3034, 2957, 2929, 2857, 1598, 1501, 1472, 1463, 1378, 1257, 1198, 1175, 1155, 1094, 1060, 1014 cm<sup>-1</sup>; <sup>1</sup>H NMR (CDCl<sub>3</sub>, 400 MHz)  $\delta$  0.00 (s, 3 H), 0.18 (s, 3 H), 1.00 (t, *J* = 7.2 Hz, 3 H), 1.03 (s, 9 H), 1.72-1.88 (m, 2 H), 2.61 (s, 3 H), 4.70 (apparent t, *J* = 5.5 Hz, 1 H), 7.08 (apparent d as part of AA'BB' system, *J* = 8.6 Hz, 2 H), 7.36 (apparent d as part of AA'BB' system, *J* = 8.7 Hz, 2 H), 7.45 (apparent d as part of AA'BB' system, *J* = 8.6 Hz, 2 H), 7.84 (apparent d as part of AA'BB' system, *J* = 8.3 Hz, 2 H); <sup>13</sup>C NMR (CDCl<sub>3</sub>, 100 MHz)  $\delta$  -5.0 (q), -4.7 (q), 9.8 (q), 18.2 (s), 21.7 (q), 25.8 (q), 33.5 (t), 75.5 (d), 121.9 (d), 127.0 (d), 128.5 (d), 129.6 (d), 132.3 (s), 144.7 (s), 145.2 (s), 148.3 (s); exact mass *m/z* calcd for C<sub>22</sub>H<sub>32</sub>NaO<sub>4</sub>SSi 443.16828, found 443.16826.

**4-[(S)-1-(tert-Butyldimethylsilyloxy)propyl]phenol (20).**

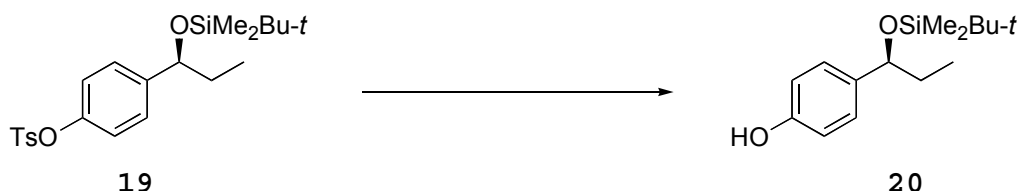

Na(Hg) (815.0 mg, 10% Na, 3.543 mmol) was added to a

stirred, cloudy solution of **19** (316.4 mg, 0.7444 mmol) in 80% MeOH (5.4 mL). The flask was flushed with Ar and stirring was continued for 45 min to give a clear, colorless solution. The mixture was then decanted from the remaining amalgam into a separatory funnel containing phosphate buffer solution (KH<sub>2</sub>PO<sub>4</sub>-NaOH, pH 7, 8 mL) and Et<sub>2</sub>O (8 mL). Saturated aqueous oxalic acid (2 mL) was then added and the biphasic mixture was shaken and separated. The aqueous layer was extracted with Et<sub>2</sub>O (2 x 6 mL) and the combined organic extracts were washed with brine, dried (MgSO<sub>4</sub>) and evaporated. Flash chromatography of the residue over silica gel (1.5 x 25 cm), using 0-20% EtOAc-hexanes (gradient elution), gave **20** as a colorless oil (119.3 mg, 60%) and recovered **19** (102.3 mg, 32%). Phenol **20** had:  $[\alpha]^{22}_D$  -19.32 (*c* 1.41, CHCl<sub>3</sub>); FTIR (CHCl<sub>3</sub> cast) 3349, 3024, 2958, 2930, 2858, 1614, 1600, 1514, 1472, 1463, 1361, 1252, 1059, 836 cm<sup>-1</sup>; <sup>1</sup>H NMR (C<sub>6</sub>D<sub>6</sub>, 400 MHz) (phenolic OH not observed)  $\delta$  -0.09 (s, 3 H), 0.05 (s, 3 H), 0.87 (t, *J* = 6.7 Hz, 3 H), 1.06 (s, 9 H), 1.66-1.88 (m, 2 H), 4.54 (dd, *J* = 5.5, 7.1 Hz, 1 H), 6.62 (apparent d as part of AA'BB' system, *J* = 8.8 Hz, 2 H), 7.19 (apparent dd as part of AA'BB' system, *J* = 0.6, 8.6 Hz, 2 H); <sup>13</sup>C NMR (C<sub>6</sub>D<sub>6</sub>, 100 MHz)  $\delta$  -4.8 (q), -4.4 (q), 10.3 (q), 18.4 (s), 26.1 (q), 34.1 (t), 76.5 (d), 115.1 (d), 127.4 (d), 137.7 (s), 155.4 (s); exact mass *m/z* calcd for C<sub>15</sub>H<sub>26</sub>NaO<sub>2</sub>Si 289.15943, found 289.15935.

**Trifluoromethanesulfonic Acid 4-[(*S*)-1-(*tert*-butyldimethylsilyloxy)propyl]phenyl Ester (**21**).**

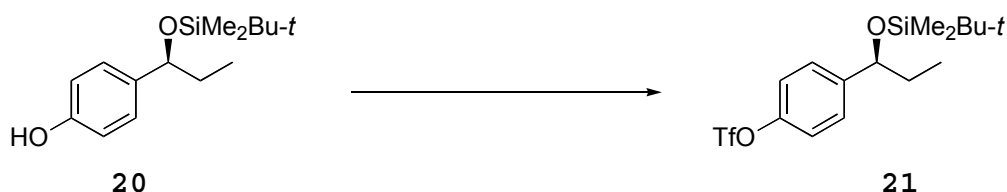

(CF<sub>3</sub>SO<sub>2</sub>)<sub>2</sub>O (0.07 mL, 0.4 mmol) was added dropwise by syringe to a stirred and cooled (-78 °C) solution of **20** (99.9 mg, 0.375 mmol) and Et<sub>3</sub>N (0.09 mL, 0.6 mmol) in CH<sub>2</sub>Cl<sub>2</sub> (1.8 mL) (Ar

atmosphere). Stirring was continued for 10 min and then saturated aqueous NaHCO<sub>3</sub> (0.5 mL) was added. The cooling bath was removed and the mixture was poured into a separatory funnel containing water (5 mL) and CH<sub>2</sub>Cl<sub>2</sub> (5 mL). The mixture was shaken and the organic phase was dried (MgSO<sub>4</sub>) and evaporated. Flash chromatography of the residue over silica gel (1.5 x 20 cm), using 13% EtOAc-hexanes containing a trace (0.5-1% v/v) of Et<sub>3</sub>N, gave **21** (111.6 mg, 75%) as a colorless oil:  $[\alpha]^{22}_D$  -21.08 (*c* 0.48, CHCl<sub>3</sub>); FTIR (CHCl<sub>3</sub> cast) 2959, 2932, 2859, 1500, 1427, 1251, 1214, 1143, 890, 861, 837 cm<sup>-1</sup>; <sup>1</sup>H NMR (C<sub>6</sub>D<sub>6</sub>, 400 MHz)  $\delta$  0.00 (s, 3 H), 0.18 (s 3 H), 0.95 (t, *J* = 7.4 Hz, 3 H), 1.12 (s, 9 H), 1.57-1.77 (m, 2 H), 4.54 (dd, *J* = 5.1, 6.9 Hz, 1 H), 7.04 (apparent d as part of AA'BB' system, *J* = 8.7 Hz, 2 H), 7.18 (apparent dd as part of AA'BB' system, *J* = 0.5, 8.9 Hz, 2 H); <sup>13</sup>C NMR (C<sub>6</sub>D<sub>6</sub>, 100 MHz)  $\delta$  -5.0 (q), -4.7 (q), 9.7 (q), 18.3 (s), 25.9 (q), 33.6 (t), 75.4 (d), 119.3 (s, CF<sub>3</sub> quartet, *J* = 318.6 Hz), 121.0 (d), 127.7 (d), 146.1 (s), 148.6 (s); exact mass *m/z* calcd for C<sub>16</sub>H<sub>25</sub>F<sub>3</sub>NaO<sub>4</sub>SSi 421.10872, found 421.10906.

**(S) - tert-Butyldimethyl(1-phenylpropoxy) silane (22).**

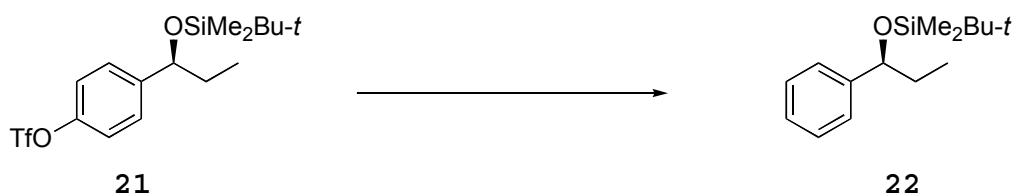

Pd-C (10% w/w, 60.8 mg, 0.0571 mmol) was added to a solution of **21** (99.0 mg, 0.248 mmol) and Et<sub>3</sub>N (0.11 mL, 0.79 mmol) in EtOAc (5 mL). The stirred mixture was degassed by sequentially evacuating the flask (house vacuum) and then admitting H<sub>2</sub>, the procedure being repeated twice more. A hydrogen-filled balloon was then left in place and stirring was continued for 3 h. The heterogeneous mixture was filtered through a short pad (0.5 x 1.0 cm) of silica gel, using EtOAc as a rinse. Evaporation of the solvent gave **22** (62.6 mg, 100%) as a yellowish oil:  $[\alpha]^{22}_D$  -

32.21 (*c* 0.66, CHCl<sub>3</sub>); FTIR (CHCl<sub>3</sub> cast) 3065, 3028, 2958, 2930, 2858, 1493, 1472, 1463, 1453, 1361, 1257, 1104, 1086, 1058, 1013, 860, 837, 775, 699 cm<sup>-1</sup>; <sup>1</sup>H NMR (C<sub>6</sub>D<sub>6</sub>, 400 MHz)  $\delta$  -0.10 (s, 3 H), 0.04 (s, 3 H), 0.87 (t, *J* = 7.3 Hz, 3 H), 0.97 (s, 9 H), 1.58-1.79 (m, 2 H), 4.51 (dd, *J* = 5.2, 7.0 Hz, 1 H), 7.07 (tt, *J* = 1.3, 6.7 Hz, 1 H), 7.16-7.19 (m, 2 H), 7.26-7.28 (m, 2 H); <sup>13</sup>C NMR (C<sub>6</sub>D<sub>6</sub>, 100 MHz)  $\delta$  -4.8 (q), -4.5 (q), 10.2 (q), 18.4 (s), 26.1 (q), 34.0 (t), 76.7 (d), 126.2 (d), 127.2 (d), 128.3 (d), 145.8 (s); exact mass *m/z* calcd for C<sub>15</sub>H<sub>26</sub>NaOSi 273.16451, found 273.16448.

**(S)-1-Phenylpropan-1-ol (23).**

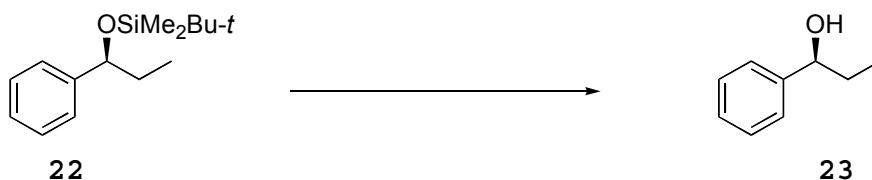

Bu<sub>4</sub>NF (1M in THF, 0.3 mL, 0.3 mmol) was added to a stirred solution of **22** (56.0 mg, 0.224 mmol) in THF (3.6 mL) (Ar atmosphere). The mixture was stirred for 12 h, diluted with Et<sub>2</sub>O (8 mL) and washed with water (2 x 4 mL) and once with brine (4 mL), dried (MgSO<sub>4</sub>) and evaporated. Flash chromatography of the residue over silica gel (0.5 x 30 cm), using 20% Et<sub>2</sub>O-pentane containing a trace (0.5-1% v/v) of Et<sub>3</sub>N, gave an impure product. Further purification by Kugelrohr distillation and flash chromatography over silica gel (0.5 x 30 cm), using 20% EtOAc-hexanes containing a trace (0.5-1% v/v) of Et<sub>3</sub>N, gave **23** (21.5 mg, 71%) as a colorless liquid whose <sup>1</sup>H NMR spectrum was identical to that reported.<sup>28</sup> The material had: [ $\alpha$ ]<sup>22</sup><sub>D</sub> -29.26 (*c* 1.23, CHCl<sub>3</sub>) [Lit.<sup>28,29</sup> [ $\alpha$ ]<sup>22</sup><sub>D</sub> -45.6 (*c* 1.3, CHCl<sub>3</sub>)] indicating an er = 88:12.

**References**

- 31 D. C. Harrowven and I. L. Guy, *Chem. Comm.* 2004, 1968-1969.
- 32 A. J. M. Janssen, A. J. H. Klunder and B. Zwanenburg,

*Tetrahedron* 1991, **47**, 7645-7662.

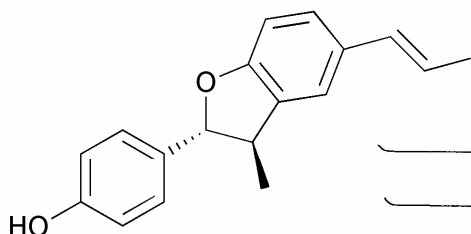

Synthetic (-)-conocarpan (1)

400 MHz 1D in CDCl3 (ref. to CDCl3 @ 7.26 ppm), temp 26.8 C -> actual temp = 27.0 C, asw400 probe

exp1 s2pal

```

SAMPLE          DEC. & VT
date Sep 4 2006 dfrq 399.794
solvent cdcl3 dn H1
file /mat/d600/hom-dpwr 3
e14/clivenmr/nmrda- dof 0
ta/2Proc/ES-8-108.- dm mnn
fid dnm c
ACQUISITION    dmf 200
sfreq 399.794 dseq
tn H1 dres 1.0
at 4.998 homo y
np 48000 temp 25.8
sw 4801.9 DEC2
fb not used dfrq2 0
bs 4 dm2
ss 2 dpwr2 1
tpwr 58 dcf2 0
pw 6.6 dm2 n
d1 0.100 dnm2 c
tof -50.0 dmf2 200
nt 16 dseq2
ct 16 dres2 1.0
alock n homo2 n
gain 16 PROCESSING
FLAGS          gf not used
in n gfs not used
dp Y proc lp
hs nn fn 131072
DISPLAY        math f
sp -457.9
wp 4801.8 weir
vs 808 wexp
sc 0 wbs
wc 250 wnt wft
hzmm 19.21
ls 55229.15
rf1 3352.5
rfp 2894.5
th 3
ins 1.000
    
```

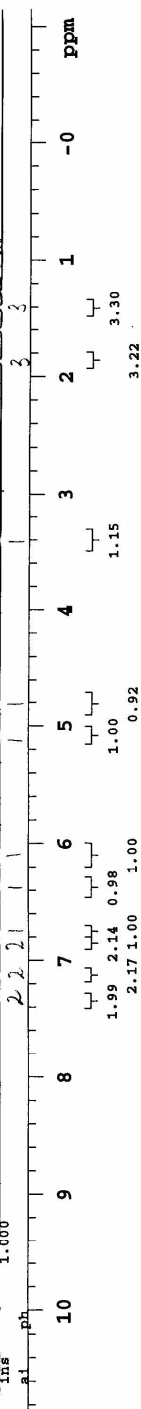

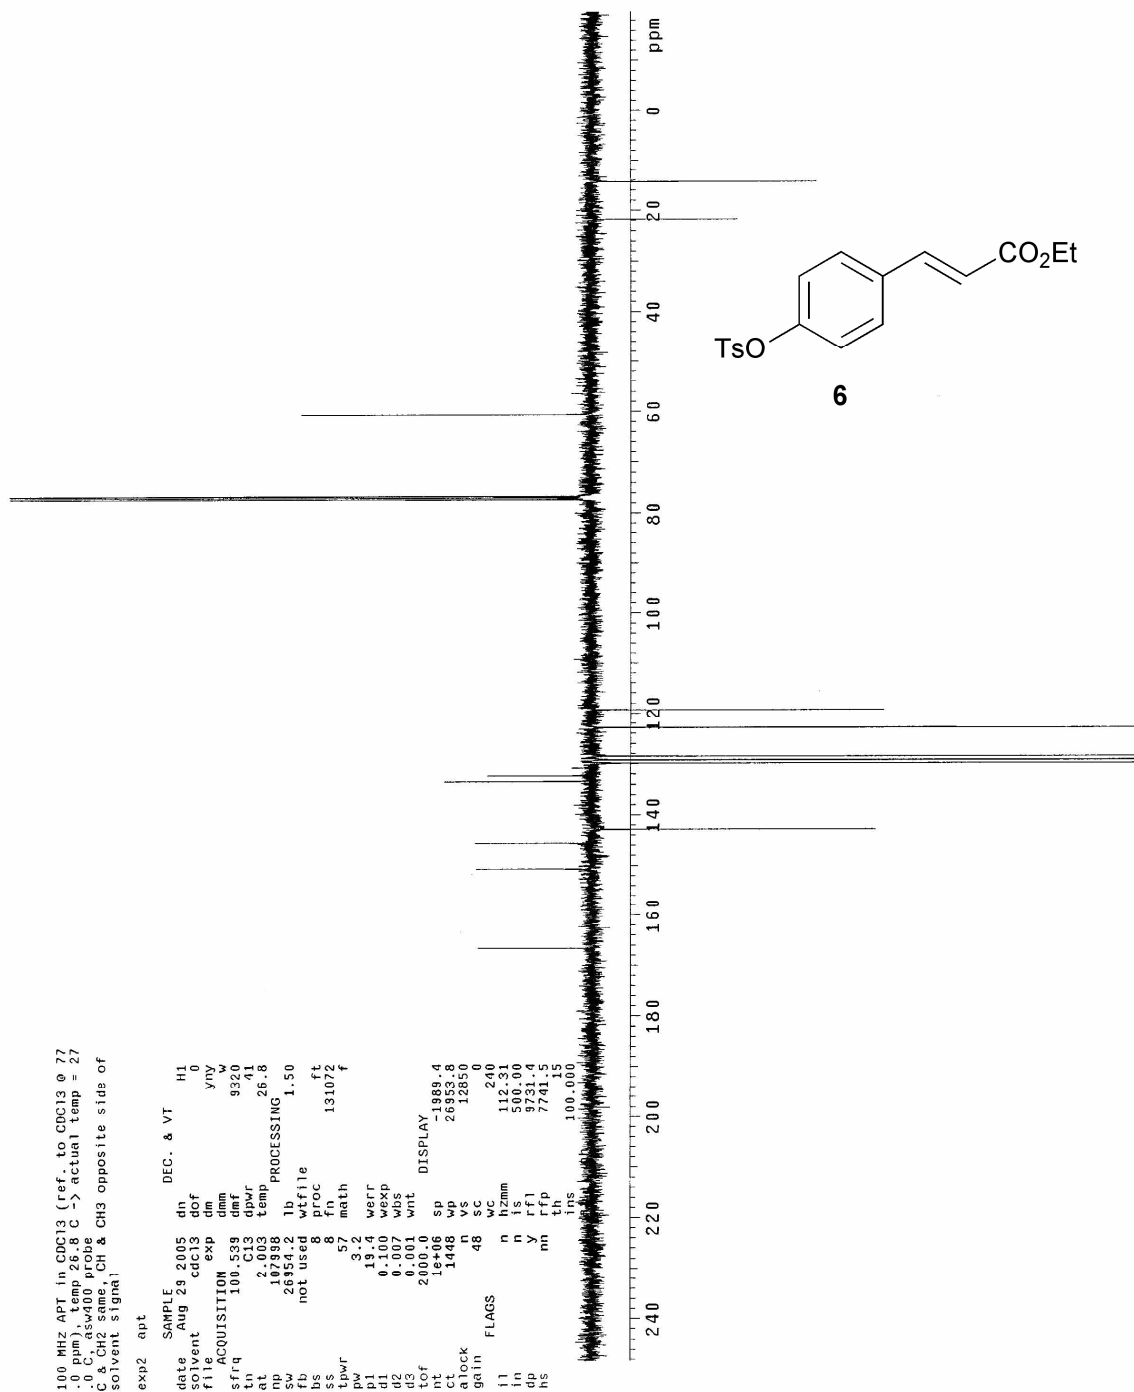

400 MHz 1D in CDCl3 (ref. to CDCl3 @ 7.26 ppm), temp 26.8 C -> actual temp = 27.0 C, asw400 probe

exp1 s2pul

SAMPLE DEC. & VT

date Aug 30 2005 dfrq 399.794  
solvent cdcl3 dn H1  
file /mat/d600/hom-dpwr 3  
e14/clivemr/mrda-dcf 0  
ta/2Pure/BS-5-144.-.dn nnn  
fid dnm C

ACQUISITION

sfrq 399.794 dmf 200  
tn H1 dres 1.0  
at 1.999 homo Y  
np 19200 temp 26.8  
sw 4801.9 DEC2  
fb not used dfrq2 0  
bs 4 dnt2

ss 2 dpwr2 1  
tpwr 59 dcf2 0  
pw 6.2 dm2 n  
d1 3.000 dnm2 C  
tof -50.0 dmf2 200  
nt 16 dseq2  
ct 16 dres2 1.0

alock n homo2 n  
gain 16 PROCESSING  
il n gf not used  
in n wf file not used  
dp y proc lp  
hs nn fn 131072

DISPLAY math f  
sp -451.6  
wp 4801.8 weir  
vs 149 wexp  
sc 0 wds  
wc 250 wnt wft  
hznm 19.21  
ls 2069.34  
rf1 451.7  
rfp 0  
th 50

ins 2.000  
f1 ph

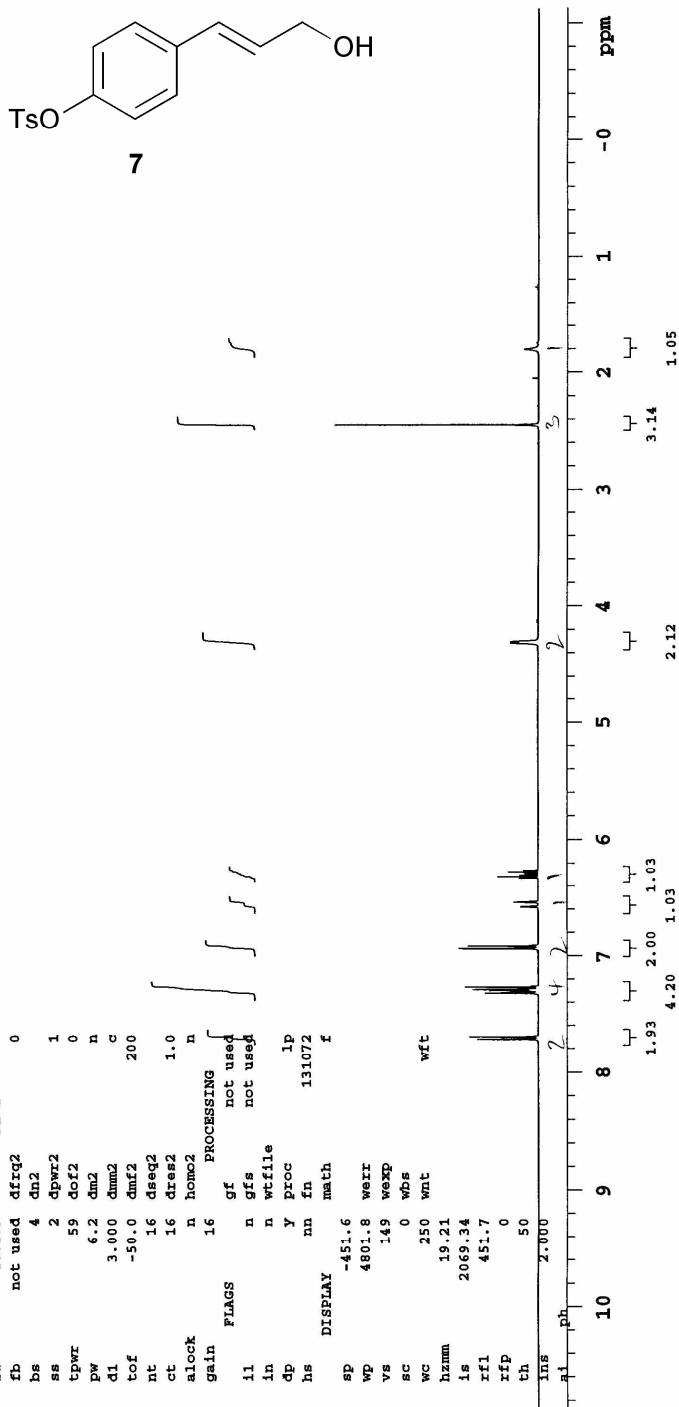



100 MHz APT in CDCl<sub>3</sub> (ref. to CDCl<sub>3</sub> @ 77  
.0 ppm), temp 26.8 C -> actual temp = 27  
.0 C, asw400 probe  
C & CH<sub>2</sub> same, CH & CH<sub>3</sub> opposite side of  
solvent signal

exp2 apt

```

SAMPLE          DEC. & VT
date Oct 23 2005   dn H1
solvent cdcl3   dof 0
file /mnt/d600/c11-   dn
veimrdata/2Pure/20-   dnm w
05.10.24.14_ES-6-4-   dmf 9320
8APT_C13_apt.fid   dpwr 41
ACQUISITION      temp 26.8
sfreq 100.539     PROCESSING
tn C13 lb 1.50
at 2.003 wtfile
np 107998 proc ft
sw 26954.2 fn 131072 f
fb not used math f
bs 8
ss 8 weirr
tpwr 57 wexp
pw 3.2 wbs
p1 19.4 wnt
d1 0.100 DISPLAY
d2 0.007 sp -1963.9
cof 2000.0 vs 24953.8
240 220.06 sc 200 180
ct 19264 wc 250
alock n hzmm 107.82
gain 48 ls 500.00
FLAGS rfl 1964.3
il n rfp 0
in n th 4
dp Y ins 100.000
hs nn al ph
    
```

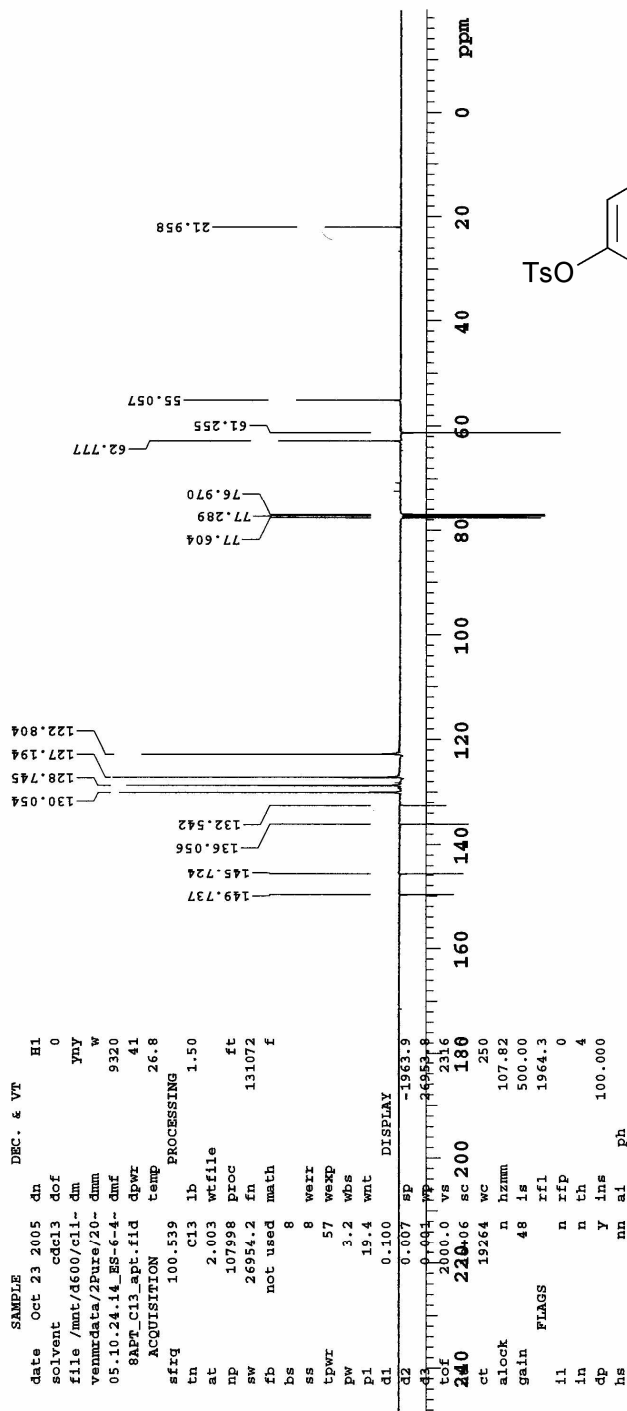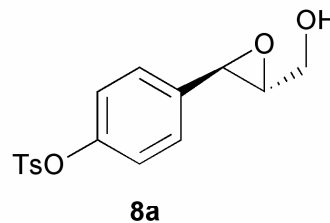

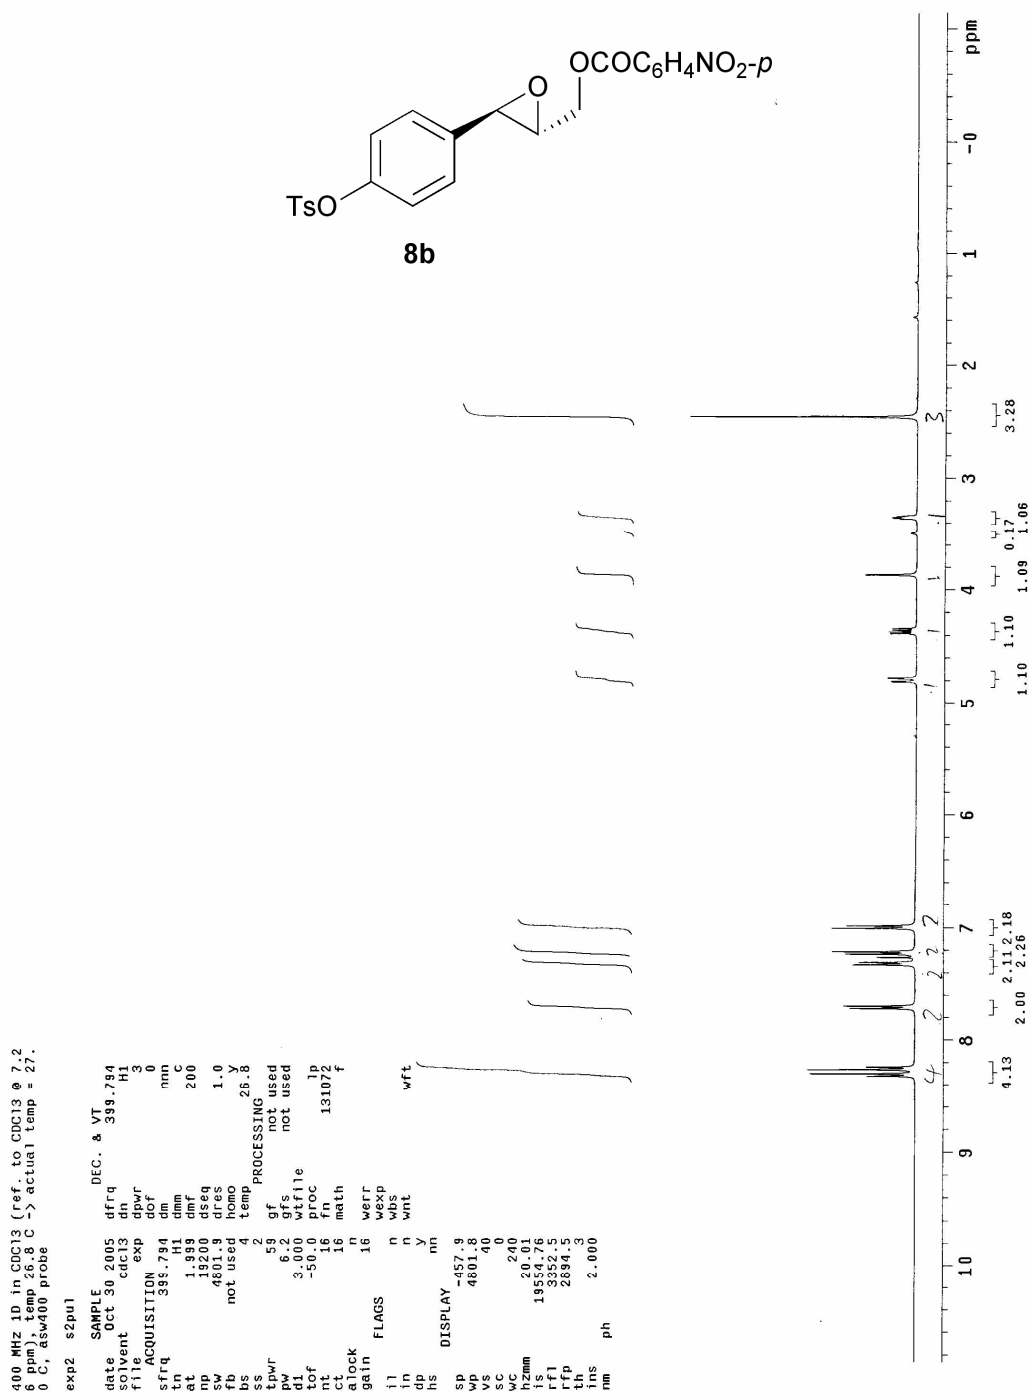

100 MHz APT in CDCl3 (ref. to CDCl3 @ 77  
-0 ppm), temp 26.8 C -> actual temp = 27  
.0 C, asw400 probe  
C & CH2 same, CH & CH3 opposite side of  
solvent signal

exp1 apt

SAMPLE DEC. & VT H1  
date Nov 23 2005 dn  
solvent cdc13 dof  
f111 ACQUISITION exp dm yny  
sfrq 100.539 dmf 9320  
tn C13 dpwr 41  
at 2.003 temp 26.8  
np 107988 PROCESSING 1.50  
sw 28954.2 lb wcf1le  
bs not used wrf1le ft  
ss 8 fnc 131072 f  
tpwr 57 math  
pw 3.2  
p1 19.4 verr  
d1 0.100 wexp  
d2 0.001  
d3 0.001  
tof 2000.0  
nt 1e+06 sp  
ct 304 wp  
atlock n vs  
gain 48 SC 2600  
fl FLAGS  
in n SC 240  
in n hzmm 112.31  
in n is 500.00  
dp y rfl 9731.4  
hs nm rfp 7741.5  
in 60  
ph 100.000

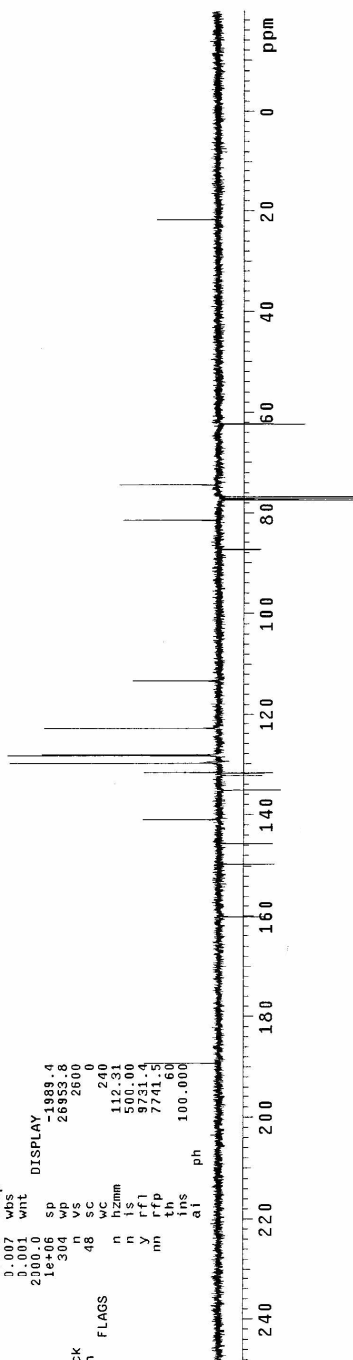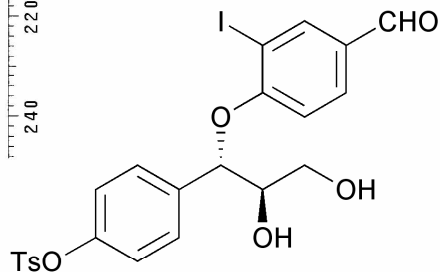

10

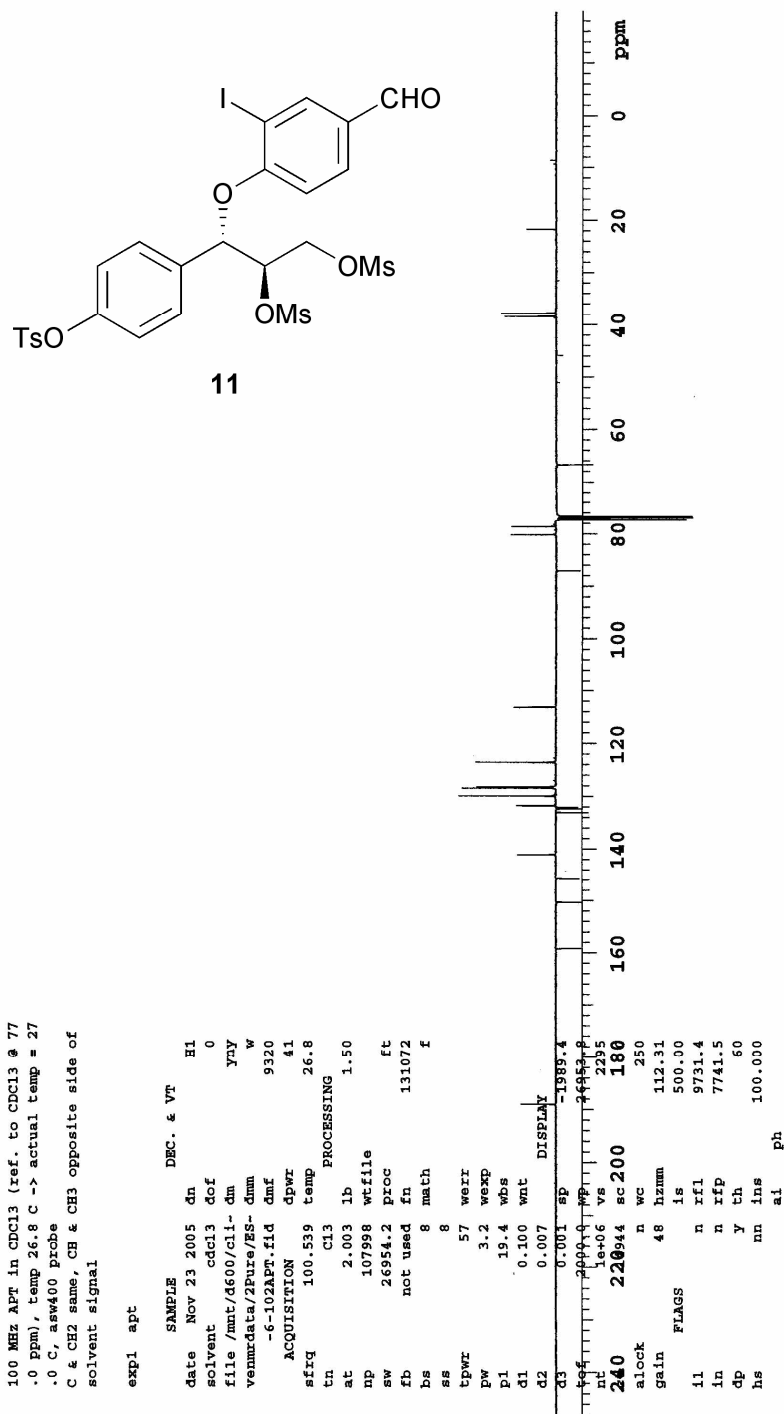

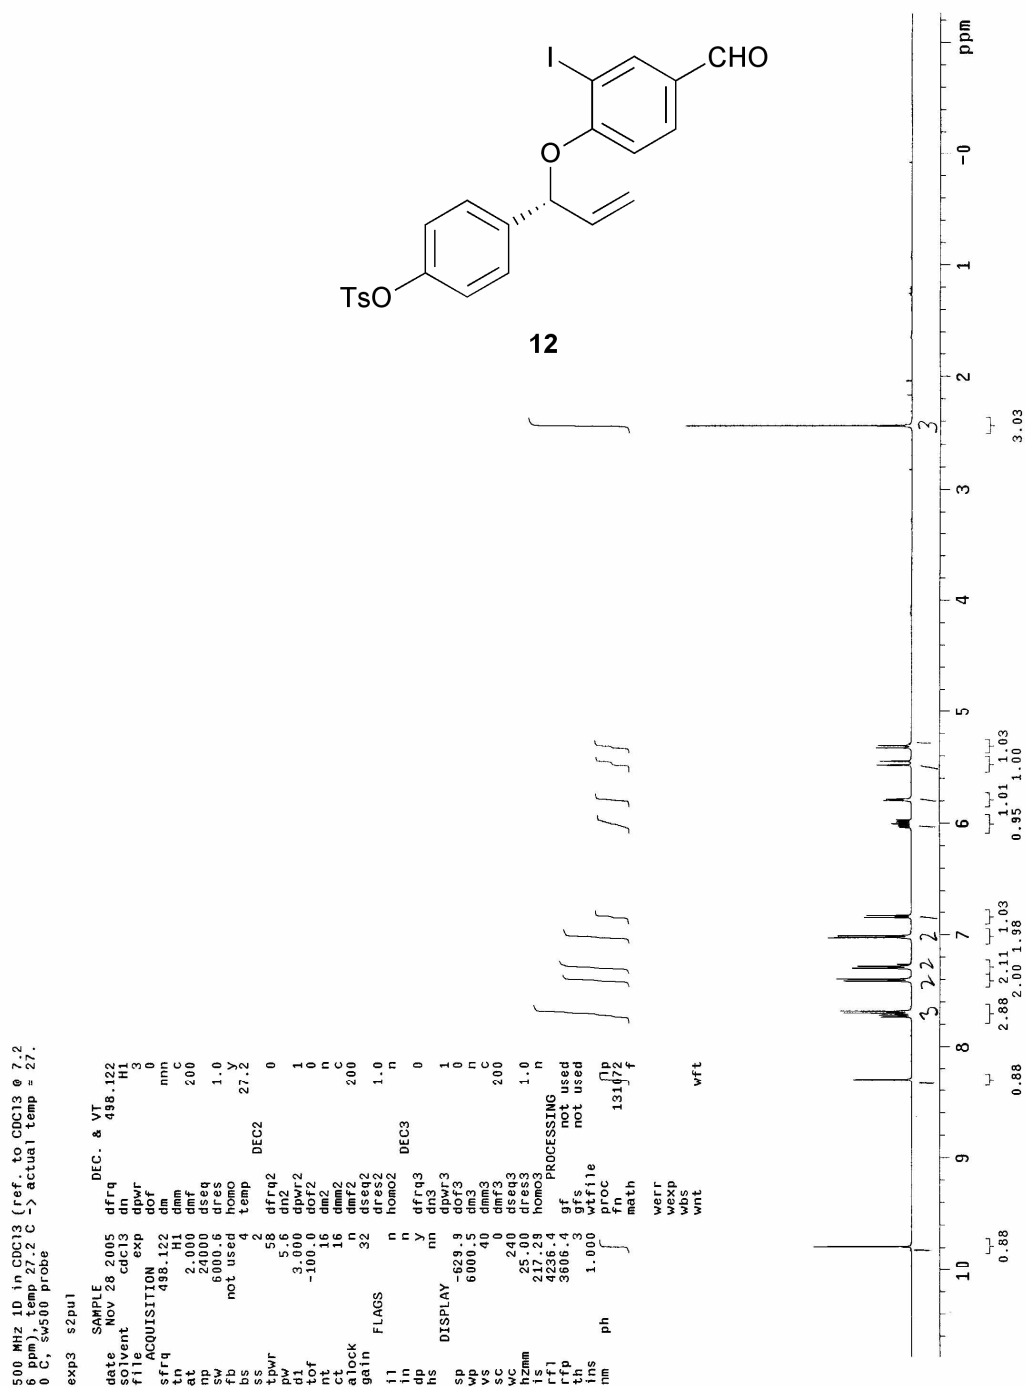

400 MHz 1D in CDCl3 (ref. to CDC13 @ 7.26 ppm), temp 26.8 C -> actual temp = 27.0 C, asw400 probe

```

exp2 s2pu1
SAMPLE
date Nov 29 2005
solvent cdcl3
file exp dpwr 3
ACQUISITION
sfrq 399.794
in 198
mp 18200
sw 4801.9
fb not used
bs 4
ss 2
tpwr 52
dt 3.000
tof -50.0
nt 16
ct 16
gain 16
fl 1
dp 1
hs 1
SP -457.9
WP 4801.8
VS 54
WC 240
f2mm 20.11
rfi 35535.21
rfp 3352.5
th 2894.5
ins 1.3
nm 1.000
ph
DEC. & VT
date Nov 29 2005
afreq 599.794
dn H1
dpwr 3
dm nmn
dmr C
dms 200
dseq 1.0
dres 1.0
dtemp 26.8
PROCESSING
gf not used
wf file not used
proc lp
fn 131072
math f
varr n
wexp n
wnt y
wft
DISPLAY
-457.9
4801.8
54
240
20.11
35535.21
3352.5
2894.5
1.3
1.000
    
```

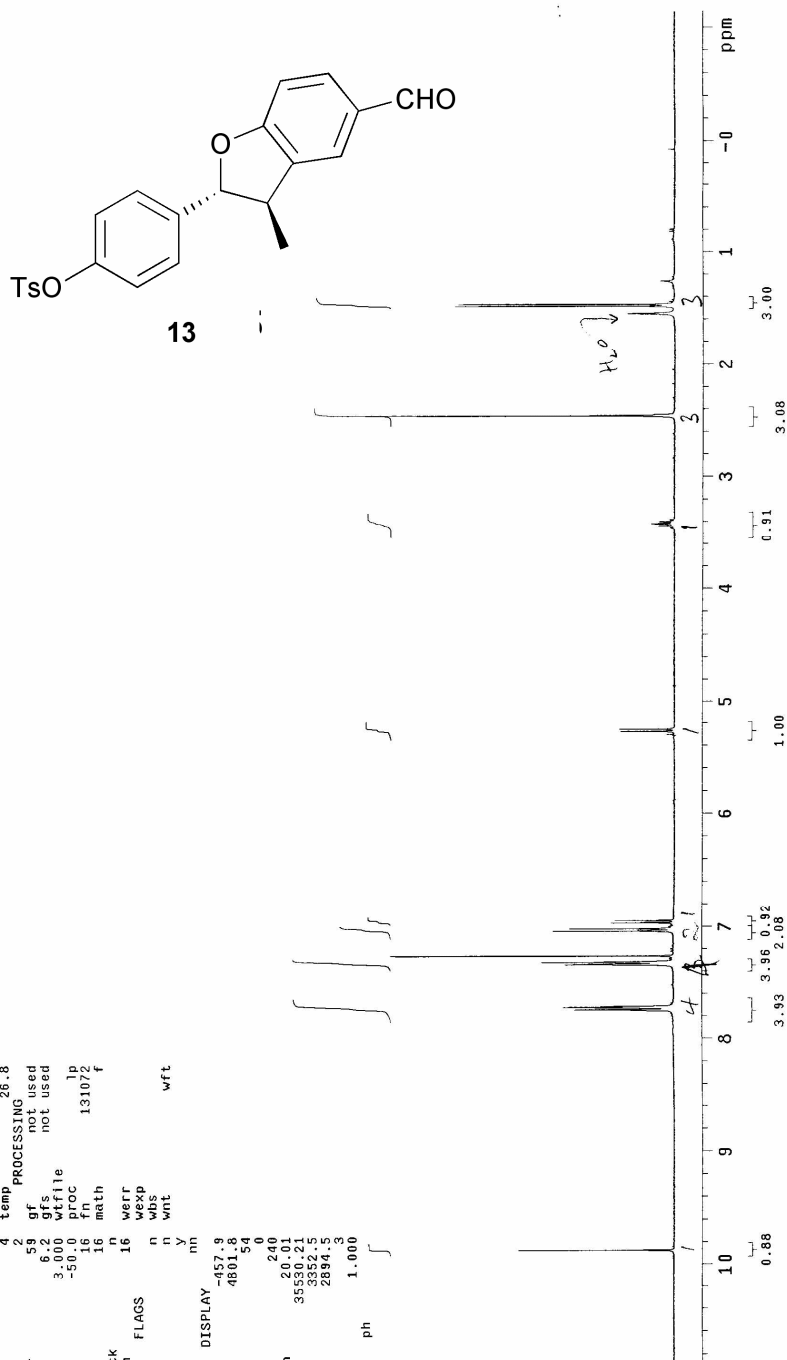

400 MHz ID in CDCl3 (ref. to CDCl3 @ 7.26 ppm), temp 27.0 C -> actual temp = 27.0 C, m100g2 probe

```

exp3 s2pu1
SAMPLE DEC. & VT
date Dec 4 2005 dfrq 400.400
solvent cdcl3 dm f1 6
F1 ACQUISITION EXP 0.0
sfrq 400.400 dm nnn
tn H1 dnm C
at 1.999 dmf 200
np 43204 dsdq 1.0
fb not used homs 1.0
bs 2 temp 27.0
ss 2 PROCESSING
tpwr 60 gf
pw 6.7 gfs not used
td 3.000 wrfile not used
tf -10016 fnc lp
nt 131072
ct 16 math f
alock n
gain 16 verr
il n wexp
in n
dp y Wrt
hs DISPLAY nm
sp -471.7
wp 480540
sc 0
wc 240
hzmm 20.01
ls 821.28
rfi 5368.8
th 2306.3
ins 3.180
nm ph
    
```

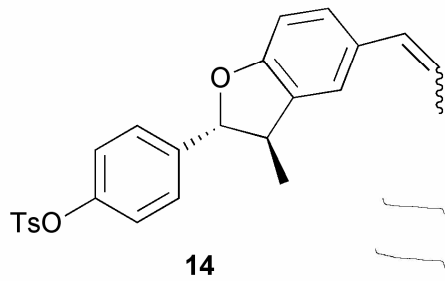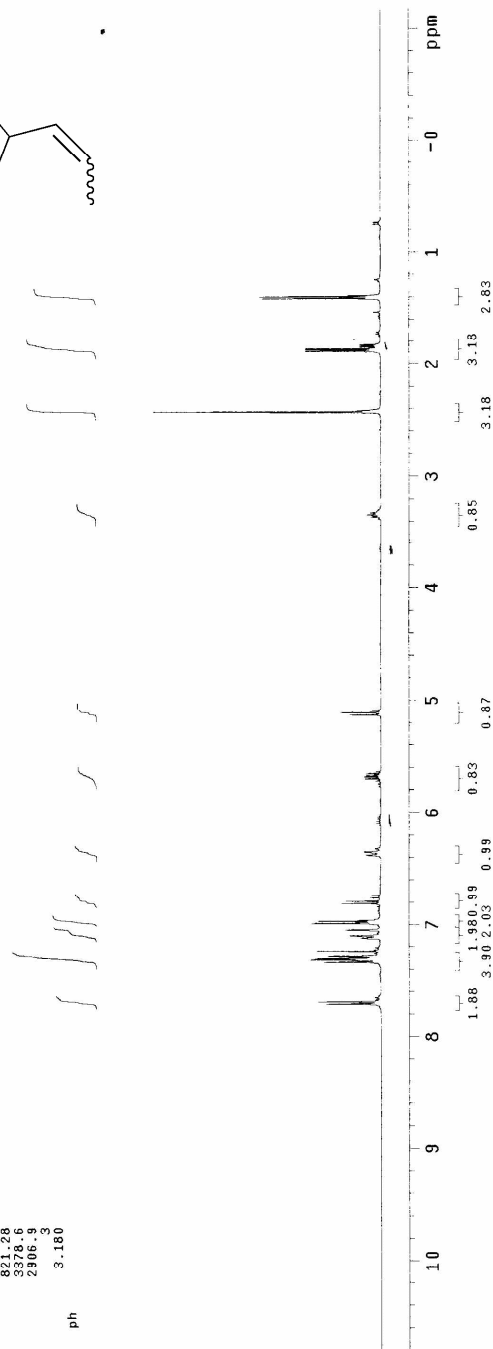

10 9 8 7 6 5 4 3 2 1 0 ppm

1.88 1.980.99 0.83 0.87 0.85 3.18 3.13 2.83 3.18 2.83

400 MHz 1D in C6D6 (ref. to C6D6 @ 7.15 ppm), temp 27.0 C -> actual temp = 27.0 C, m400gz Probe

exp2 s2pul

SAMPLE DEC. & VT

```

date Sep 7 2006 dfrq 400.400
solvent c6d6 dn H1
file /mat/4600/hom-dpwr 6
e14/clivenmr/nmrda-dof 0.0
ta/2Pure/ES-8-106c-dm mnn
rudefid dnm c
ACQUISITION dmf 200
sfrq 400.400 dseq
tn H1 dres 1.0
at 5.002 homo Y
np 48008 temp 27.0
sw 4798.5 DEC2
fb not used dfrq2 0
bs 4 dn2 4
ss 2 dpwr2 1
tpwr 60 dof2 0
pw 6.7 dnm2 n
d1 0.100 dnm2 c
tof -100.0 dmf2 200
nt 16 dseq2
ct 16 dres2 1.0
gain n homo2 n
PROCESSING
flags gf 0.500
il n gfs 0.400
in n wfile
dp y proc lp
hs nn fn 131072 f
DISPLAY
sp -449.1
wp 4798.4 weir
vs 230 wexp
sc 0 wbs
wc 250 wnt wft
hzmm 19.19
is 703.14
f1 3312.0
f2 2862.8
th 2
ins 3.000
    
```

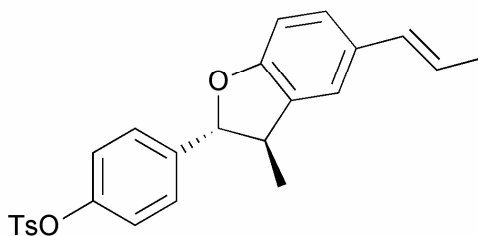

15 in C<sub>6</sub>D<sub>6</sub>  
 (10-day reaction)

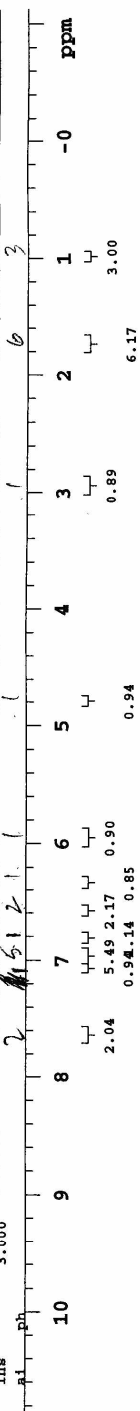



100 MHz APT in CDCl3 (ref. to CDCl3 @ 77.0 ppm), temp 27.0 C -> actual temp = 27.0 C, mdd002z, probe C-13, Sample CH & CH3 opposite side of solvent signal

```

exp1 apt
SAMPLE
date May 18 2005 DEC. & VT
solvent cdcl3 dof 0.0
file exp dm ynv w
ACQUISITION
sfrq 100.632 dmf 11500 w
tn 2 C13 dpwr 45
rt 108110 temp 27.0
sw 27027.0 lb 1.50
fb 15000 wfile
bs 8 proc ft
ss 8 fn 131072
tpwr 20 math
p1 14.4 werr
d1 0.100 wexp
d2 0.007 wbs
d3 0.001 wnt
tof 2000.0
ct 1886 sp
ct 2084 sp
atlock n vs 180
gain 30 sc 0
FLAGS
il n hzmm 240
in v hzmm 112.61
ds v f1 9765.08
hs nm rfp 7753.3
th ins 60
at ph 100.000
    
```

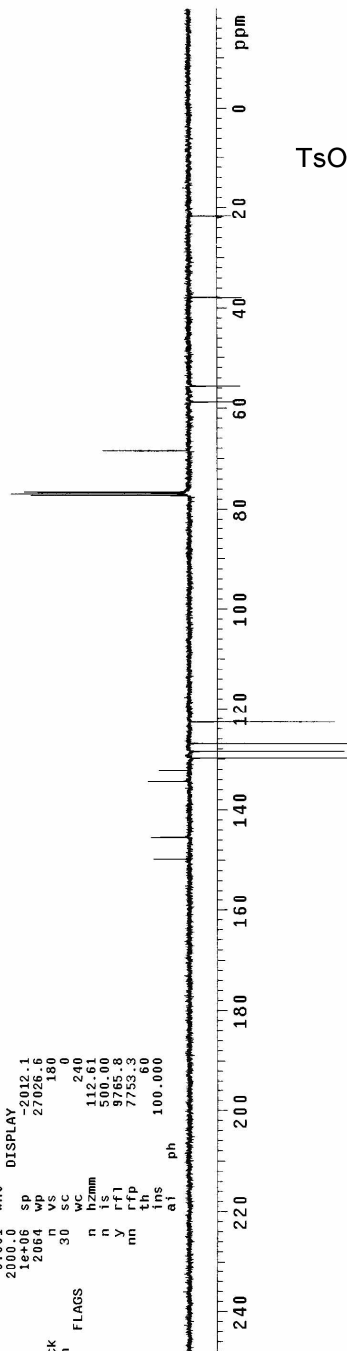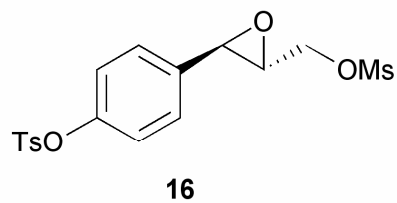

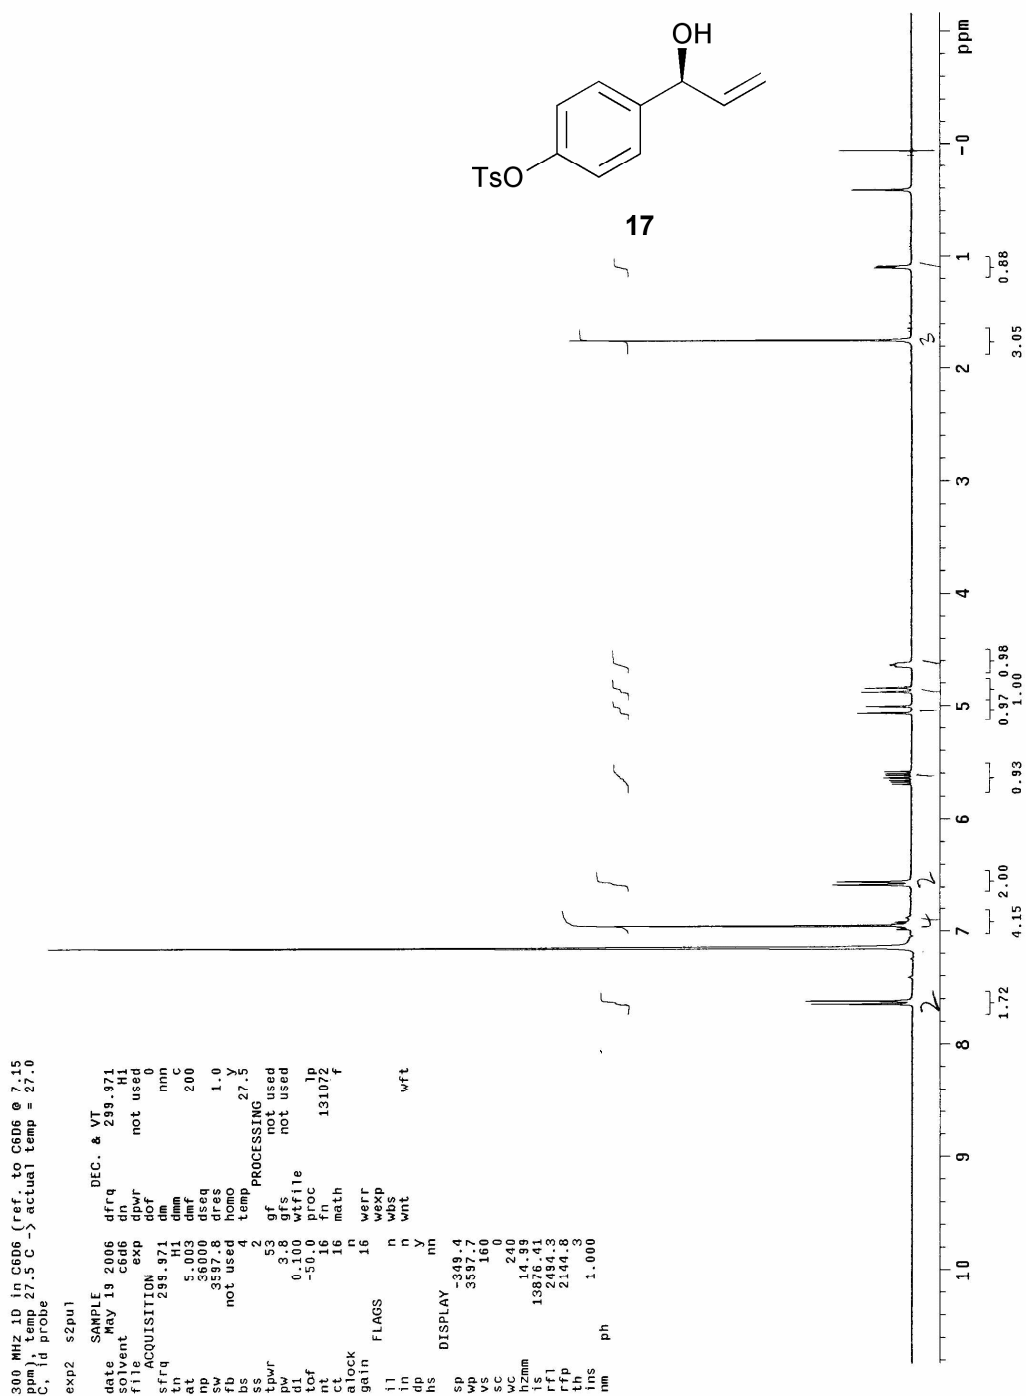

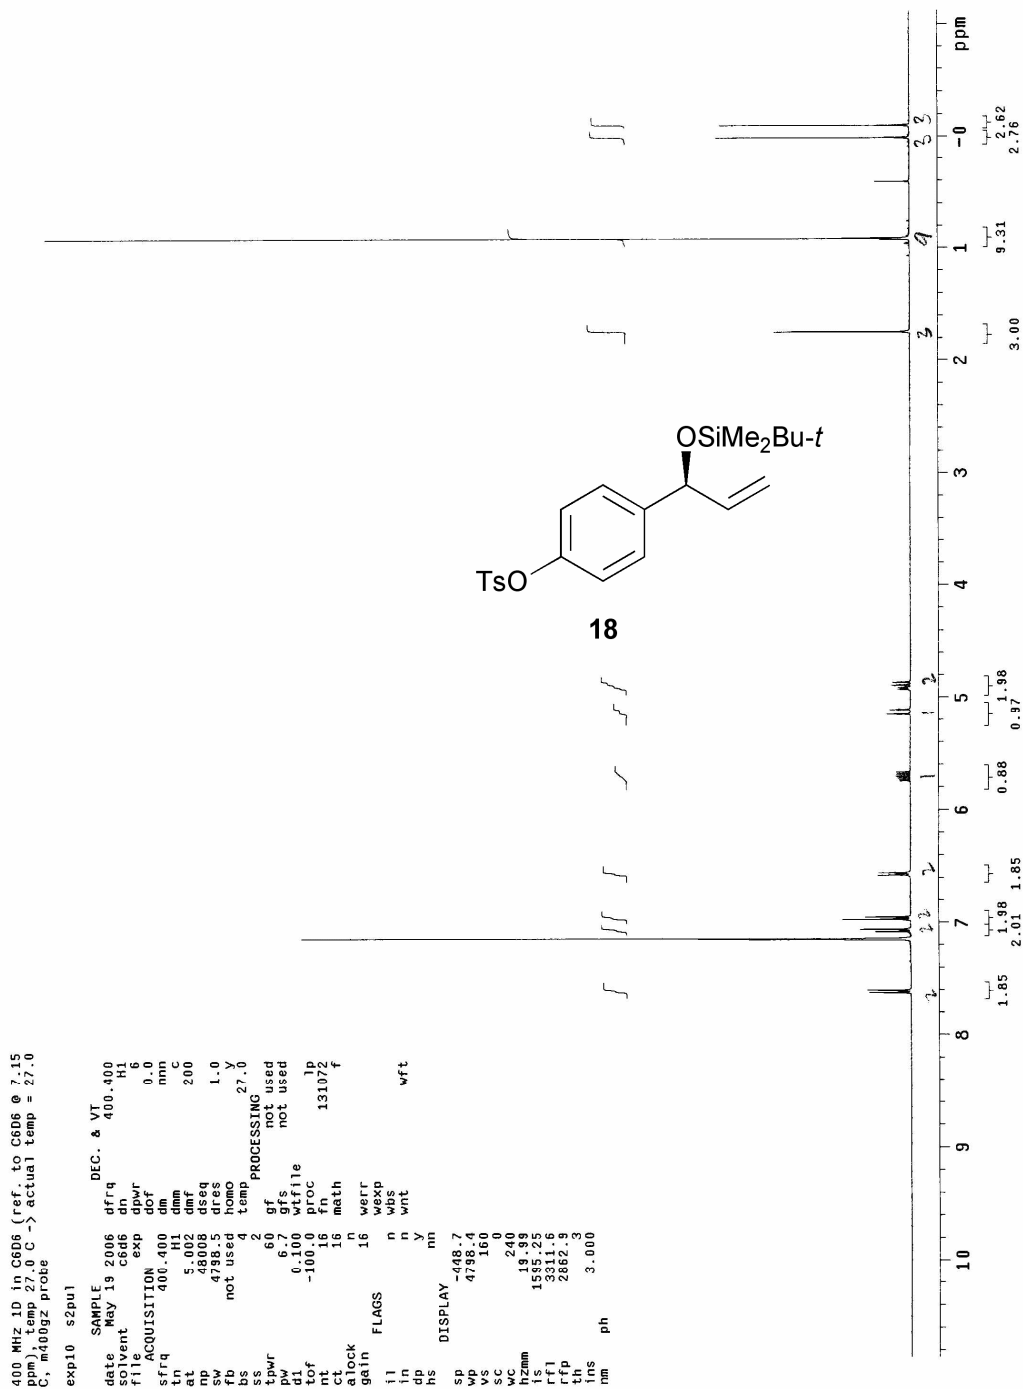

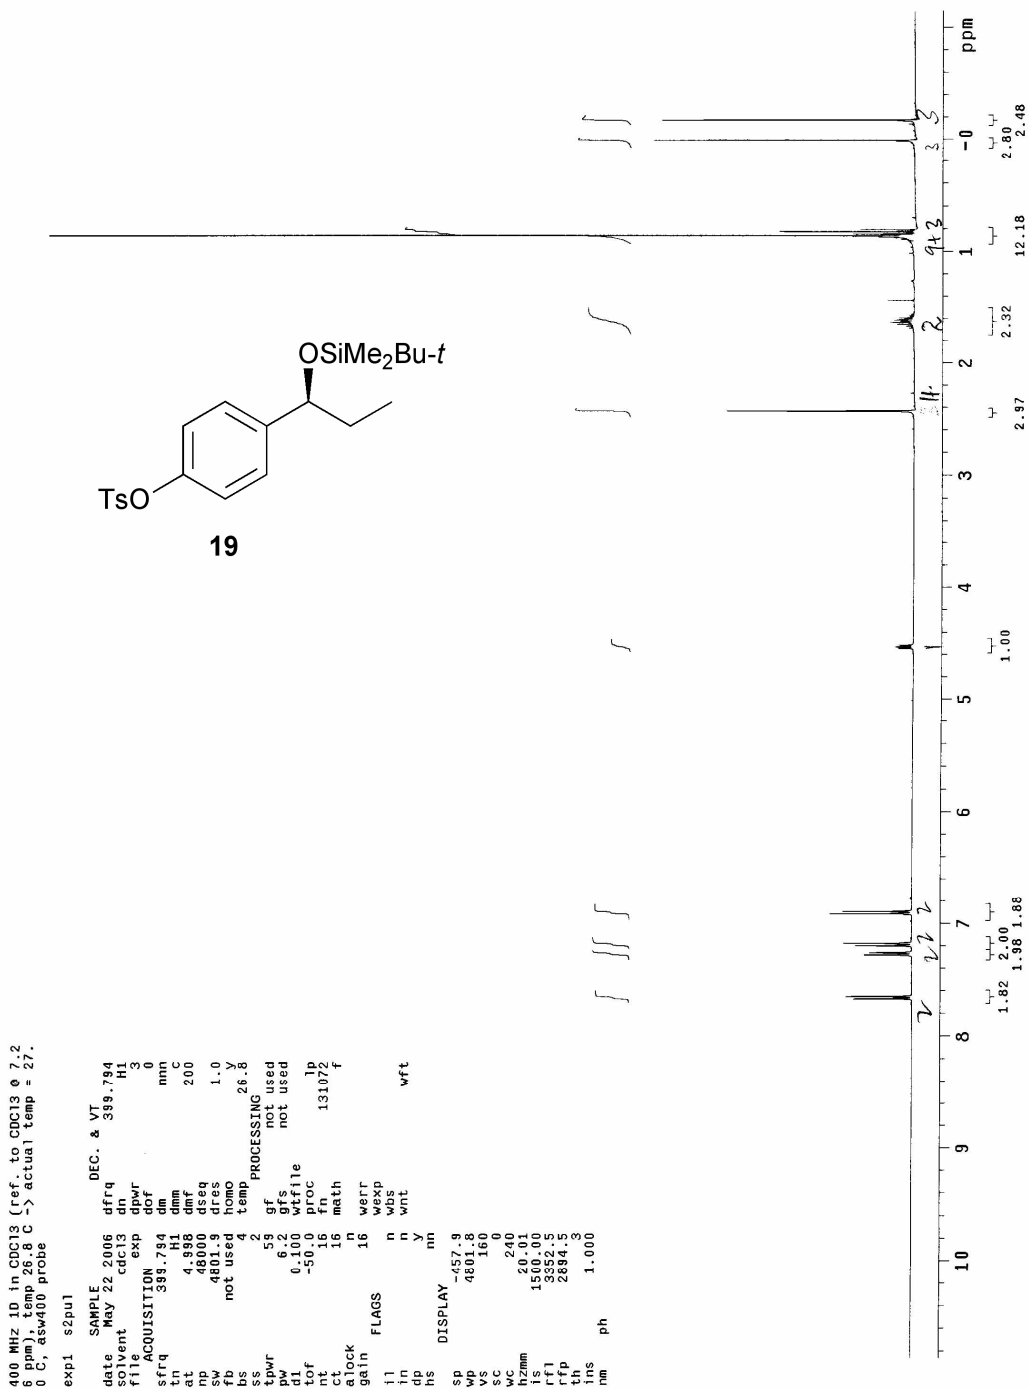

400 MHz 1D in C6D6 (ref. to C6D6 @ 7.15 ppm), temp 26.8 C -> actual temp = 27.0 C, asw400 probe

exp4 s2pu1

```

SAMPLE          DEC. & VT
date    May 22 2006   dfrq    399.794
solvent  t/ds00     dn      not used
p14/c1vsmr/nmrda~ dcf      0
ta/2Pure/ES-7-98.f~ dn      nnn
id      dnm      200
ACQUISITION
sfrq    399.794   dmf      C
at      4.988     dseq     1.0
mp      4800     hmc     1.0
sw      4801.9   temp    26.8
fb      not used gf      not used
bs      not used 4 gfs    not used
ss      2        wfile   not used
pwr     59      proc     jp
d1      0.100   math    131072
nt      -100.0  werr
ct      16     wexp
atlock  n      wbs
gain    16     wnt
il      n      flags
in      n
dp      y
hs      nm
sp      -486.8  display
wp      4301.8
vs      809
sc      0
wc      220
p1mm    18
rfl     3345.4
th      2358.5
ins     1.000
al      ph
    
```

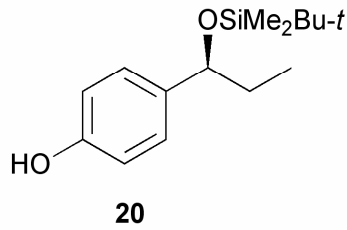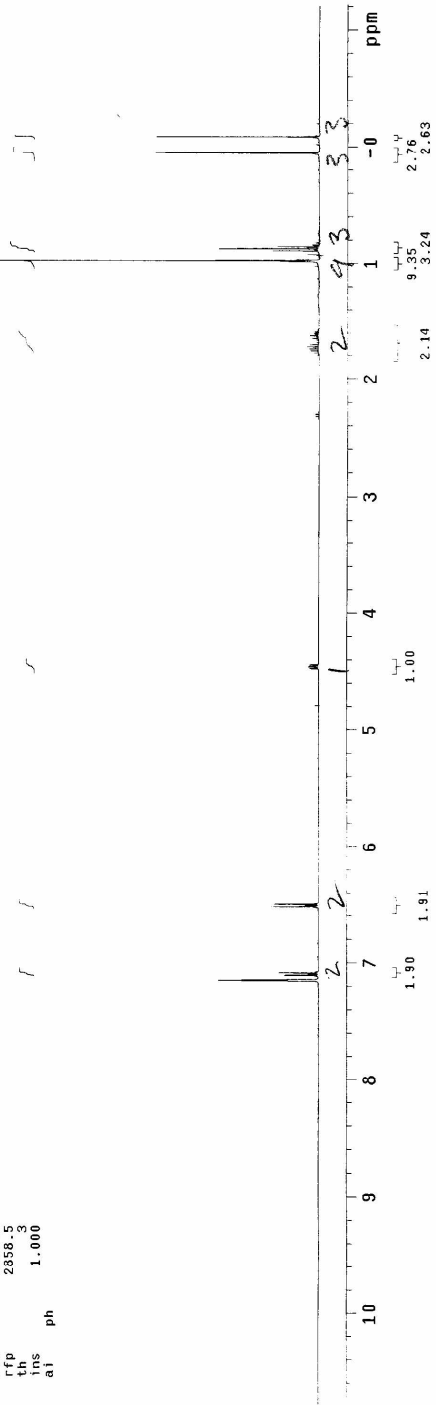

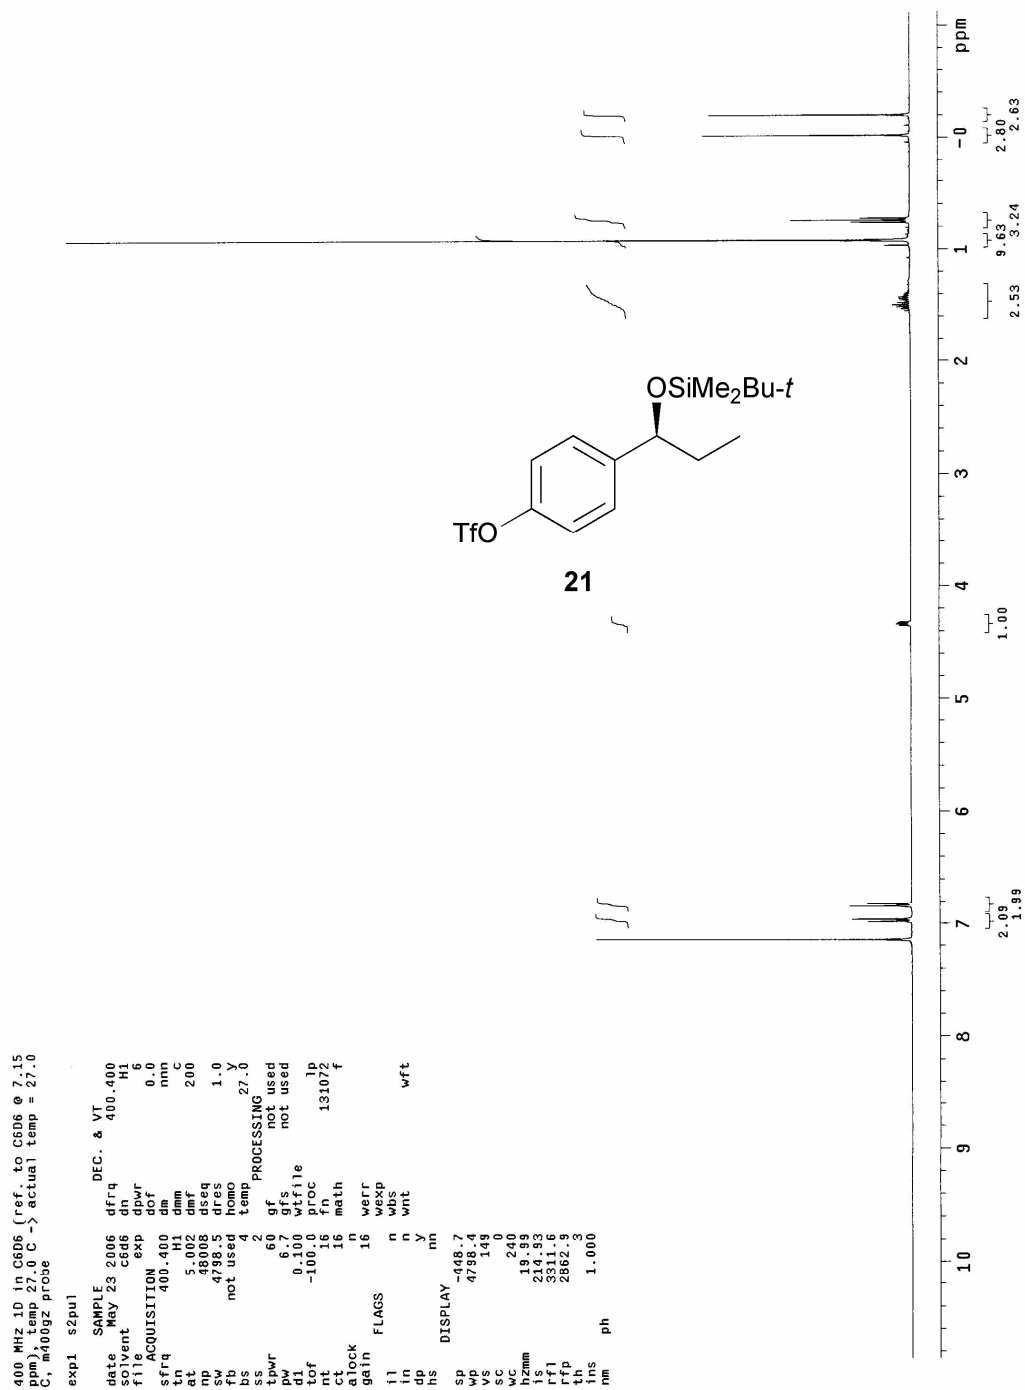

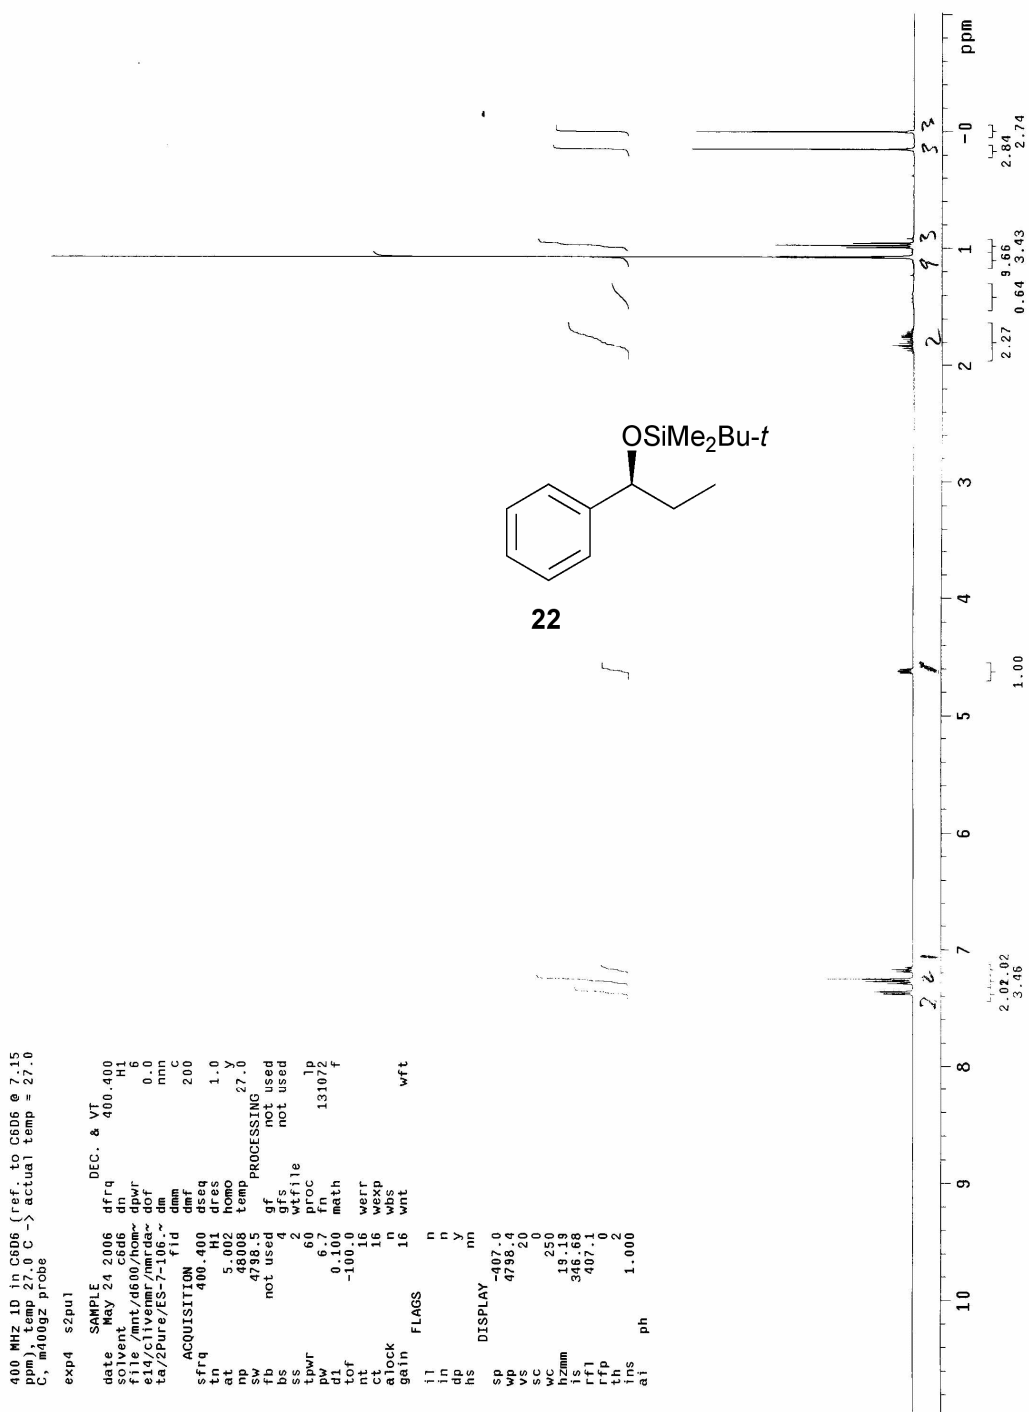

300 MHz 1D in CDCl3 (ref. to CDCl3 @ 7.26 ppm), temp 27.5 C -> actual temp = 27.0 C, id probe

exp1 s2pul

SAMPLE DEC. & VT

date May 29 2006 dfrq 299.971  
 solvent cdcl3 dn H1  
 file /mnt/d600/home-dpwr 3  
 e14/clivenmr/mmrda- dof 0  
 ta/2Pure/ES-7-110.- dn nnn  
 fid dnm c

ACQUISITION

sfrq 299.971 dmf 200  
 tn H1 dseq 1.0  
 at 5.003 homo n  
 np 36000 temp 27.5  
 sw 3597.8 DEC2  
 fb not used dfrq2 0

bs 4 dm2  
 ss 2 dpwr2 1  
 tpwr 53 dof2 0  
 pw 3.8 dm2 n  
 dl 0.100 dnm2 c

tof -50.0 dmf2 200  
 nt 16 dseq2  
 ct 16 dres2 1.0

alock n homo2  
 gain 16 PROCESSING n

il n gf not used  
 in n wtfile not used

dp Y proc lp  
 hs mn in 131072 f

sp -395.5 math  
 wp 3597.7 wevr  
 vs 251 wexp

sc 0 wbs wft  
 wc 250 wnt  
 hznm 14.39

ls 2564.43  
 rf1 395.6  
 rfp 0  
 th 2

ins 1.000

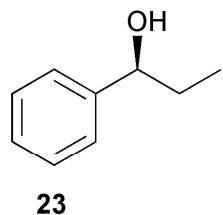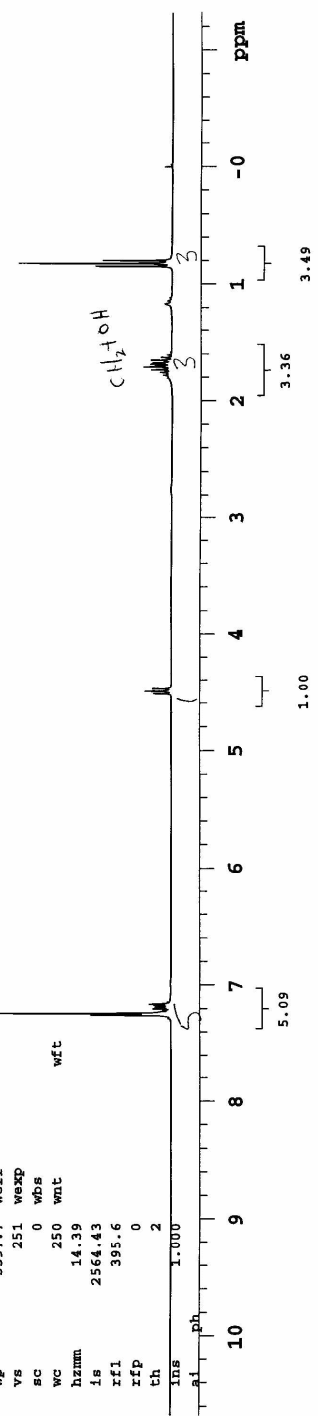

Supplement: b704211f.pdf [file b704211f.pdf]
